# Supplementary material for: Identification of risk factors for mortality associated with COVID-19
Source: PeerJ. 2020 Sep 1;8:e9885. doi: 10.7717/peerj.9885 (PMC7473053; doi:10.7717/peerj.9885)
Supplement: Supplemental Information 2 — These data were used for identifying risk factors for mortality in COVID-19. [file peerj-08-9885-s002.xlsx]

## Sheet: Sheet1
	Age	Sex	var	LDL	TC	TG	hrcp I	HDL	nucleotidase	C-reactive protein	D-dimer	α-hydroxybutyrate dehydrogenase	γ-glutamyltranspeptidase	neutrophil percentage	neutrophil count	lactate	lactate dehydrogenase	prothrombin time	thrombin time	prealbumin	percentage of monocytes	monocytes count	percentage of basophils	basophils count	percentage of eosinophils	eosinophils count	INR	urea nitrogen	uric acid	average hemoglobin concentration	average hemoglobin amount	total carbon dioxide	total bile acid	total bilirubin	total protein	chlorine	APTT	percentage of lymphocyte	lymphocyte count	globulin	ratio of leukocyte to globulin	leukocyte	albumin	direct bilirubin	alkaline phosphatase	phosphorus	erythrocytes	width of RBC volume distribution	hematocrit
1	79	F	1-79	3.61	6.18	1.13	0.003	1.85	1.06	6.56	1.69	2492	19	65.7	6.87	2.72	229	12	19.2	230.7	15.9	0.24	0	0.02	0.2	0	0.98	4	201	323	29	27.1	4.2	9.7	70.7	109	24.7	22.7	0.96	27.1	1.51	3.3	31.4	3.5	69	0.61	3.77	11.9	37.1
2	59	F	10-59	2.29	4.06	0.91	0.018	1.26	1.76	84.61	0.34	265	17	81	2.83	1.45	385	11.4	26.2	74.5	7.5	0.26	0.2	0.01	0	0	0.98	3.5	260	322	28	25.2	5.5	7.1	65.6	98	32.6	11.3	0.4	28	1.34	3.5	37.6	2.9	43	0.75	4.26	11.7	37.5
3	64	M	100-64	1.31	2.33	1.76	0.173	0.47	1.4	60.33	0.71	295	27	77.5	5.03	3.99	371	12.6	21.3	34.7	7.7	0.5	0.1	0.01	0	0	1.08	7.2	220	317	29	22.4	8.3	12.8	68.6	111	28.7	14.7	0.96	33.9	1.02	6.5	34.7	6.9	54	0.88	5.32	13.7	48.6
4	49	M	101-49	2.3	3.63	0.69	0	1.01	1.44	1.04	0.22	164	31	41.3	0.74	2.17	201	12	21.5	149.9	8.4	0.15	0	0	0.5	0.01	1.03	5.8	232	321	30	24	2.9	7.8	69.7	109	28.7	49.8	0.9	26.5	1.63	1.8	43.2	2.8	57	1	4.41	12.1	41.2
5	52	M	103-52	2.96	4.71	1.75	0	0.98	1.53	21.71	1.35	286	36	84.5	5.15	2.6	347	11.1	26.6	116.9	3.9	0.24	0.2	0.01	0	0	0.96	4.8	165	318	30	22.9	2.7	7.6	64.5	103	26.5	11.4	0.7	32.9	0.96	6.1	31.6	3	56	0.71	4.36	11.9	41.5
6	32	F	105-54	1.54	2.76	0.95	0.006	0.84	7.83	36.24	0.55	192	56	54.9	1.96	1.58	320	12.4	20.7	97.7	13.1	0.47	0.7	0.03	0.2	0.01	1.07	2.3	153	314	28	25.5	4.3	5.7	63.7	106	36.8	31.1	1.11	27.1	1.35	3.6	36.6	2.9	70	1.07	3.84	11.9	34.6
7	52	M	106-52	2.04	3.54	1.16	0.002	0.99	2.89	122.99	0.33	224	50	80.7	3.91	2.18	314	11.7	27.6	129.8	7.2	0.35	0.1	0	0	0	1.01	5.5	373	333	31	18.1	7.9	7.4	63.5	102	35.4	12	0.58	27.9	1.28	4.8	35.6	3.7	41	1.02	4.19	11.6	38.6
8	62	M	107-62	2.4	3.69	1.09	0.007	0.78	1.73	75.23	0.35	306	23	70.7	3.71	3.5	366	12.7	25.8	103.4	4.3	0.23	0	0	0	0	1.09	4.8	252	344	31	26	7.1	14.1	69.9	98	36.4	25	1.32	33.7	1.07	5.3	36.2	5.2	61	1.17	4.3	11.7	39
9	51	F	110-51	1.4	2.8	1.02	0.019	0.93	1.96	86.39	0.55	225	21	74.8	1.86	2.9	266	11.6	17.9	102.1	6.9	0.17	0.1	0	0	0	1	3.8	196	318	31	24.6	5.9	5.1	66.5	101	28.8	18.2	0.45	34.5	0.93	2.5	32	2.4	56	1.01	4.23	11	41.6
10	40	F	112-40	2.88	2.69	2.7	0.01	1.24	6.59	2.39	1.02	2492	19	71.2	2.14	2.6	229	12.1	18.5	159.6	9.6	0.29	0.1	0	0.4	0.01	0.94	3	223	310	29	23.6	4.2	9.7	66	110	36.4	18.7	0.56	27.1	1.51	3	40.4	3.5	69	0.86	4.15	12.6	38.1
11	25	F	114-26	1.73	3.15	0.94	0.012	0.83	1.06	0.28	1.11	306	12	86.1	9.06	2.1	530	11.6	17.6	402.5	3.1	0.33	0.2	0.02	0.1	0.01	1.02	3.7	201	318	31	26.8	25.3	5.6	66.7	103	26.2	10.5	1.1	30.9	1.77	10.5	34.4	2.9	59	1.18	4.13	11.5	39.9
12	51	F	115-51	2.51	3.98	2.25	0	0.84	11.12	36.05	3.11	2492	262	55.2	1.25	4.2	2465	11.2	20.9	99.2	8.7	0.2	0.2	0	0	0	0.97	2.2	304	306	28	28.1	8	10.3	70.7	102	28.8	35.9	0.81	34.3	1.06	2.3	36.4	4.5	243	1.18	3.97	12.9	36.1
13	64	M	116-64	2.75	3.88	1.35	0.004	0.71	3.02	42.48	0.95	254	29	47.7	1.09	2.1	291	12.1	22.8	119.6	13.4	0.31	0.6	0.01	0	0	1.04	5	372	327	31	22.8	5.8	9.5	64.5	102	26	38.3	0.87	28.1	1.3	2.3	36.4	3.5	50	1.13	4.42	11.5	41.3
14	64	F	117-64	2.88	4.47	1.56	0.035	0.95	4.79	50.52	0.23	207	61	73.6	3.99	2.37	291	11.7	27.4	134.5	6.7	0.36	0	0	0.1	0.01	1.01	4.4	161	315	28	22.7	4.1	9.8	70	104	35.7	19.6	1.06	33.6	1.08	5.4	36.4	3.2	103	0.97	3.93	11.9	35.3
15	63	F	118-63	1.94	3.29	0.77	0.027	0.86	1.22	83.18	5.28	309	12	82.4	4.69	2.37	403	13.2	24	51.7	5.3	0.3	0.1	0.01	0	0	1.13	2.8	69	318	29	25.2	0.5	10.3	57.9	100	33.9	12.2	0.69	26.4	1.19	5.7	31.5	4.3	42	0.79	4.07	12.3	37
16	29	M	119-29	1.73	2.89	1.02	0	0.72	1.72	0.18	0.39	152	12	56.1	1.39	1.9	164	12.3	18.3	192.5	7.6	0.19	0.1	0	0	0	1.06	4.3	434	329	29	27.2	5.8	13.3	75.9	102	33.8	36.2	0.9	32.1	1.36	2.5	43.8	4.6	53	1.16	5.36	11.8	47.1
17	56	M	120-56	1.42	2.78	0.55	0.001	0.94	1.74	11.85	0.43	172	24	62.7	1.76	1.33	224	12.1	20	111.2	12.7	0.36	0.3	0.01	0	0	1.04	4.8	222	321	29	25.2	5.2	8.3	66	101	32.6	24.3	0.68	26	1.54	2.8	40	3.7	55	0.85	4.5	11.9	40.3
18	36	M	121-36	1.88	2.81	0.99	0	0.55	3.4	10.67	0.43	195	42	62.1	1.74	1.57	267	12.2	18.6	152.5	9.8	0.28	0.4	0.01	0	0	1.05	6.3	329	325	30	23.7	8.4	12.1	67.4	103	35.6	27.7	0.78	26.7	1.52	2.8	40.7	4.6	60	1.04	4.8	11.5	43.8
19	68	M	122-68	3.43	5.15	2.46	0.044	0.87	3.45	89.01	0.68	272	36	82	3.25	2.4	307	12	18.1	103.8	4.9	0.19	0.1	0	0.1	0	1.03	10.9	437	317	30	18.7	10.9	5.1	65.7	106	43.2	12.9	0.51	33.4	0.97	4	32.3	2.6	75	0.63	4.05	12.3	37.9
20	42	F	123-42	1.81	3.76	2.22	0	1.09	4.32	7.17	0.34	145	30	42.1	1.18	1.8	167	10.6	19.1	220.9	13	0.36	0	0	0.5	0.01	0.92	3.9	318	324	31	27.9	6	4.7	79.3	102	23.1	44.4	1.24	35.5	1.23	2.8	43.8	1.9	69	0.98	4.48	11.4	42.6
21	50	F	125-50	2.56	4.3	1.27	0.002	0.85	1.06	11.37	1.09	189	10	68.1	3.54	3.06	621	10.7	19.7	181.6	7.6	0.4	0.1	0.01	0.7	0.04	0.93	7.1	201	310	29	23.6	2.1	9.7	64.2	110	27.1	23.5	1.22	28.6	1.19	5.2	27.9	4.6	55	1.04	4.37	12	40.2
22	38	F	126-38	2.27	3.8	1.03	0	1.06	2.37	33.38	0.57	194	21	57.1	1.61	2.3	235	10.6	18.9	127.3	13.7	0.38	0.5	0.01	0.2	0.01	0.92	2.4	230	311	28	26.7	4	5.5	65.3	105	30.7	28.5	0.8	29.6	1.21	2.8	35.7	2.3	49	0.94	4.35	12.1	39
23	35	F	127-35	1.12	2.54	1.48	0.003	1.01	2.43	16.94	0.25	374	14	72.8	2.67	3	436	10.8	27.2	115.4	5.5	0.2	0.1	0	0.2	0.01	0.93	2.3	76	330	30	24.1	4.9	6.3	61.1	100	28.1	21.4	0.78	26.3	1.32	3.7	34.8	2.8	47	1.08	4.19	12	38.6
24	32	M	128-32	2.45	4.05	1.01	0.002	1.06	3.27	28.08	0.13	191	26	51.8	1.56	2.95	246	11.8	18.8	189.4	6.5	0.2	0.1	0	0.2	0.01	1.02	4.2	374	306	28	23.2	9	11.4	80.4	105	28.3	41.4	1.25	35.5	1.26	3	44.9	4	44	1.07	5.27	12.4	47.8
25	61	F	130-61	2.73	4.37	1.79	2.478	0.98	1.66	43.85	0.25	207	28	60.1	2.47	4.31	274	12.6	15.7	104.4	10.1	0.42	0.7	0.03	1.9	0.08	1.02	4.5	131	315	30	22	6	5.3	65.5	107	40.6	27.2	1.12	25.5	1.57	4.1	40	2.4	89	0.91	4.44	11.2	41.6
26	63	M	133-63	1.9	3.09	1.51	0.045	0.64	4.03	76.53	1	251	126	83.5	7.98	3.43	324	12.7	28.2	115.5	8.1	0.78	0.1	0.01	0.5	0.05	1.09	3.6	152	349	30	19.5	2.9	10.6	60.2	108	34.9	7.8	0.75	31.2	0.93	9.6	29	5.8	96	0.8	3.77	13.1	32
27	64	F	136-64	2.16	3.83	1.31	0	1.04	1.74	25.48	0.41	230	11	50.9	1.1	2.78	299	11.6	22.2	136.2	8.9	0.19	0.1	0	0	0	1	4	247	320	30	20.9	5.7	6.3	65.8	101	37.8	40.1	0.87	26.1	1.52	2.2	39.7	2.6	35	0.82	4.18	11.3	38.9
28	64	M	137-65	2.24	3.84	1.32	0	0.97	1.36	36.24	0.53	389	29	61.5	6.01	4.03	492	10.7	19.1	75.8	10.1	0.21	0.2	0.01	1.9	0.01	1.11	5.5	220	321	33	17.6	6.5	7.3	64	99	24.5	8.1	0.81	29.1	1.2	3.4	34.9	3.8	32	0.82	4.62	13.7	47.1
29	53	F	138-53	1.73	3.31	0.79	0	1.11	1.16	50.53	1.69	238	9	63.5	2.74	3.1	289	11.6	18	107.7	10.8	0.47	0.1	0	0.7	0.03	1	2.1	190	312	29	21.5	2.8	8.7	65.7	101	34.4	24.9	1.07	27.5	1.39	4.3	38.2	3.1	27	1.18	4.14	12.1	38.8
30	35	F	14-35	1.27	2.34	0.89	0.001	0.69	1.69	16.91	0.92	159	12	83	3.53	0.97	224	12.4	17.3	76	4.3	0.18	0.3	0.01	0.2	0.01	1.07	3.7	185	317	31	22.3	1.2	5.2	67.4	103	37.3	12.2	0.52	29.4	1.29	4.3	38	2.4	41	1.05	4.01	11.6	39.5
31	70	F	142-70	1.48	2.85	0.96	0	0.93	2.48	21.08	1	268	59	55.4	1.92	2.6	352	13	20.2	88	6	0.21	0.1	0	0	0	0.94	1.1	154	320	30	19.4	3.3	7.4	66.4	107	42.7	38.5	1.34	33	1.01	3.5	33.4	3.6	49	1.02	3.69	12.3	35
32	80	F	143-80	2.75	4.27	0.85	0	1.05	1.25	85.67	0.45	192	9	84.3	4.84	2.85	241	10.7	20.9	49.8	3.6	0.21	0	0	0	0	1.02	4.4	247	315	29	22.6	10.2	5.6	59	106	26.5	12.1	0.69	27.5	1.15	5.7	31.5	2.5	47	0.93	3.74	11.7	34.7
33	66	F	144-66	1.67	3.19	0.87	0	1.03	2.15	13.44	1.15	183	30	68.9	2.79	3.26	222	11.2	19.4	110.7	8.8	0.35	0.1	0	0.1	0	1.15	2.7	235	323	30	22.8	2.9	6.7	62.7	104	35.4	22.1	0.89	23.3	1.69	4	39.4	2.9	60	0.94	3.93	12.4	36.4
34	64	F	145-64	1.47	2.56	0.89	0	0.66	2.03	75.79	1.21	416	77	77	4.9	4.99	524	11.9	19.4	97.1	5.7	0.36	0.1	0.01	1.3	0.08	1.01	2.9	85	325	29	26	4.4	11.4	63.5	0	36.8	15.9	1.01	33.1	0.92	6.4	30.4	4.6	58	0.68	4.13	11.7	33
35	52	M	147-52	3.5	5.43	2.67	0.063	1.02	1.84	56.41	35.2	577	124	94.8	9.49	3.22	716	12.1	20.2	171.2	1.8	0.18	0	0	0	0	1.04	8.8	190	310	30	20.3	2	16	65.5	110	21.7	3.4	0.34	31.1	1.11	10	34.4	6.2	65	1.11	4.82	13.3	46.7
36	36	M	149-36	1.76	3.17	1	0	0.97	1.74	93.8	0.26	199	29	59.7	1.6	3.54	237	11.6	17.7	175.9	9.5	0.25	0.1	0	0	0	1	3.5	310	328	29	20.1	4.4	18.5	68.7	102	30.5	30.7	0.82	26.9	1.55	2.7	41.8	7	43	1.04	4.89	12.1	43.3
37	64	M	15-64	2.53	3.98	1	0	0.95	1.99	17.99	0.29	190	16	69.4	1.84	1.95	268	13.2	17.6	123.3	7.7	0.21	0.2	0.01	0	0	1.13	6.9	255	322	30	24	4	6.3	69.7	102	32	22.7	0.61	28.1	1.48	2.7	41.6	2.7	49	0.95	4.83	11.6	45.3
38	30	M	150-30	1.45	2.8	1.25	0	0.89	1.46	2.13	0.69	156	37	52.8	1.95	2.9	192	10.7	21.2	337.1	10.7	0.4	0.2	0.01	1.6	0.06	0.93	3.4	280	326	30	27.1	7.6	9.2	65.7	103	23.2	34.7	1.28	25.3	1.6	3.7	40.4	3.7	44	0.87	5.01	12	46.1
39	33	F	151-33	2.28	3.68	1.14	0	0.87	1.24	48.45	0.43	146	13	68.6	2.43	3.47	174	11.8	23.6	124	7.4	0.26	0	0	0.1	0	1.02	4.7	134	322	29	23.3	1	9.7	61.7	103	26.6	23.9	0.84	25.9	1.38	3.5	35.8	3.1	39	0.98	4.19	12.1	38
40	44	F	152-45	2.65	3.82	1.54	0	0.71	2.19	3.77	0.67	164	14	48.2	1.12	4.12	202	11.4	17.7	148.5	7.9	0.18	2.8	0.06	3.1	0.07	0.98	3.5	215	272	20	21.9	10.9	3.2	63.3	109	30	38	0.88	28	1.26	2.3	35.3	1.9	42	1.12	4.4	12.1	33
41	31	F	155-31	1.16	2.32	0.63	0.002	0.97	2.43	21.34	0.21	262	12	54.6	1.29	3.86	350	11.4	22.8	132.7	4.7	0.11	0.2	0	0.3	0.01	0.98	1.8	217	341	33	20.1	4.8	6.6	70.6	104	28.1	40.2	0.95	29.8	1.37	2.4	40.8	3.4	28	1.12	3.89	11.2	37.5
42	57	M	157-57	1.37	2.38	0.94	0	0.65	3.36	30.27	0.49	247	55	63.3	2.8	3	287	11.2	22.4	130.8	11.9	0.53	0.1	0	0	0	0.97	3.1	330	315	29	23.5	9.9	7.5	66	102	29.9	24.7	1.09	32.4	1.04	4.4	33.6	4.3	67	0.73	5.26	12	48.9
43	44	F	164-44	1.92	3.38	1.67	0	0.99	2.62	14.75	0.26	190	23	65.4	3.03	3.7	228	10.6	19.3	194.8	5.4	0.25	0	0	0.1	0	0.92	3.5	263	317	30	24.1	9.1	8.3	75.3	101	25.7	29.1	1.35	37.5	1.01	4.6	37.8	3	49	0.8	4.65	12.1	43.7
44	63	F	166-63	2.02	3.81	1.33	0.014	1.19	5.53	19.71	0.39	268	27	48.5	2.61	3.35	341	11	19	132.3	7.6	0.41	0.6	0.03	0.3	0.02	0.95	4.3	203	317	31	17	4.9	7.6	71.8	108	29.9	43	2.31	31.4	1.29	5.4	40.4	3	61	1.05	4.1	11.7	39.7
45	58	M	169-58	2.71	3.89	0.84	0	0.76	4.5	83.26	0.2	175	49	53	1.34	2.6	195	11.8	19.1	96.9	15.7	0.4	0.2	0.01	0.9	0.02	1.02	3.7	240	330	30	29.6	15.6	14.4	66	98	37.9	30.2	0.76	33.2	0.99	2.5	32.8	5.7	75	0.83	4.76	12	42.5
46	77	F	170-77	2.56	3.87	1.29	0.024	0.83	1.48	68.9	0.96	167	24	67.6	2.96	3.4	231	11.3	18.7	176.3	5.9	0.26	0.3	0.01	0.1	0	0.98	5.1	396	321	28	18.3	4.8	8.8	65.3	105	26.3	26.1	1.14	29.2	1.24	4.4	36.1	3.5	79	0.92	4.62	13.1	40.3
47	63	M	172-64	2.23	3.92	0.82	0.001	1.19	0.75	11.31	0.9	166	14	56.6	1.3	1.48	217	11.1	18.8	154.5	15.1	0.35	0.4	0.01	0.2	0	0.96	4.4	266	310	29	25.6	2.4	6.6	65.2	100	29.6	27.7	0.63	26.2	1.49	2.3	39	2.9	27	0.93	4.43	12	41.1
48	35	F	173-35	2.76	4.51	2.05	0.014	1.16	1.69	0.39	0.26	131	14	47.8	1.14	2.19	155	10.9	18.2	266.5	6.8	0.16	0.4	0.01	0.3	0.01	0.94	4.3	206	316	31	23.8	3.2	4	79.1	106	22.9	44.7	1.06	33.1	1.39	2.4	46	1.9	56	1.33	4.76	11.3	46
49	55	M	174-55	2.52	3.96	2.05	0	0.84	4.66	11.12	0.46	175	132	64.8	2.19	2.7	207	11.6	20	234.5	5.9	0.2	0.1	0	0.5	0.02	1	3.4	365	321	31	26.8	5.2	10	73.3	103	30.5	28.7	0.97	31.5	1.33	3.4	41.8	3.3	79	0.78	5.04	12.1	49.2
50	38	F	176-38	2.59	4.01	1.1	0	0.87	2.37	15.07	0.64	172	23	70.3	3.54	4.59	218	11.6	19.2	201.4	8.7	0.44	0.1	0.01	0.7	0.04	1	4.2	368	291	26	19.9	10.7	4.9	71.1	104	33.7	20.2	1.02	27.6	1.58	5.1	43.5	2.3	54	0.97	4.46	18.7	40.5
51	61	F	179-61	2.43	4.26	1.16	0.004	1.29	4.14	60.07	1.15	191	167	81.1	4.65	3.2	234	10.9	17.6	135.7	3.9	0.22	0.2	0.01	0.9	0.05	0.94	5.2	214	339	30	25.9	9.1	7.9	62.2	102	26.2	13.9	0.8	30.4	1.05	5.7	31.8	2.8	143	0.82	3.7	11.9	32.6
52	62	F	18-62	1.56	2.77	0.62	0	0.91	1.4	131.22	1.7	218	14	74.7	3.15	3.55	261	12.9	25.6	77.7	9.5	0.4	0	0	0.3	0.01	1.11	2.7	101	329	28	23.7	7.7	9.3	65.1	100	34.6	15.5	0.65	33.5	0.94	4.2	31.6	4.6	45	1.03	4.03	11.8	34
53	44	M	181-44	2.69	4.13	3.65	0	0.66	1.17	3.18	0.47	218	21	75.4	7.98	4.14	270	11.4	24.9	346.4	6	0.64	0	0	0.4	0.04	0.98	6.2	307	314	30	21.1	3.4	4.5	73.7	103	25.1	18.2	1.93	34.1	1.16	10.6	39.6	1.9	60	1.05	4.55	12.7	43.1
54	42	M	184-42	3.24	4.66	2.82	0	0.72	4.69	6.11	1.17	213	88	62.8	3.94	4.57	241	11.6	21.8	233.6	5.7	0.36	0.3	0.02	0.7	0.04	1	5.3	194	327	30	22.7	5.5	6.1	70.2	106	26.2	30.5	1.91	32.6	1.15	6.3	37.6	2.5	59	1.19	4.71	11.7	43.1
55	54	M	185-54	1.84	3.45	3.59	0	0.69	2.93	13.52	0.28	146	25	62.9	2.07	4.08	182	11.5	21.1	232.3	5	0.16	0.1	0	0.8	0.03	0.99	4.3	177	315	29	27.2	3.6	4.3	70.9	103	34.2	31.2	1.03	29.2	1.43	3.3	41.7	2.1	65	0.76	4.92	11.8	44.9
56	60	F	186-60	2.64	4.2	3.68	0.002	0.73	1.47	9.07	0.95	143	14	65.7	4.44	5.12	178	12.7	25.2	156.9	7.9	0.53	0.2	0.01	0.2	0.01	1.01	5.3	219	307	28	23	9.2	1.5	62.7	110	46.8	26	1.76	31.6	0.98	6.8	31.1	1.3	57	1.03	3.7	11.5	33.7
57	65	M	187-65	2.28	3.4	1.74	0.002	0.54	1.04	26.43	0.78	129	30	65.3	4.36	4.12	175	11.4	22.1	178.9	12.1	0.81	0.1	0.01	0.2	0.01	0.98	6.7	158	321	31	25.5	1.6	6	59	102	27.9	22.3	1.49	23.2	1.54	6.7	35.8	2.7	47	0.86	3.9	11.6	37.9
58	65	M	188-65	2.74	4.12	1.61	0.014	0.71	1.99	104.43	1.11	339	35	77.6	2.96	5.54	420	13.9	23.6	72.4	3.1	0.12	0	0	0.3	0.01	1.19	3	157	315	30	21.8	11.5	10.7	62.2	100	41.8	19	0.72	30.9	1.01	3.8	31.3	4.5	61	0.65	4.37	12.8	41
59	37	F	189-37	1.75	3.41	0.95	0.004	1.13	3.11	20.03	1.3	211	40	59.9	2.21	3.79	268	11.2	24.6	159.1	5.9	0.22	0.2	0.01	1.4	0.05	0.97	2.4	161	319	29	23.7	11.9	5.3	68.8	104	33	32.6	1.2	26.7	1.58	3.7	42.1	2.3	51	0.99	4.09	12.1	37.4
60	52	F	190-52	2.94	5.18	7.37	0	0.62	3.19	2.67	1.42	120	41	54.6	2.45	3.55	152	11.3	20.2	8.8	4.9	0.22	0.4	0.02	1	0.04	0.98	3.5	200	322	29	21.9	7	4.8	81.5	108	30.3	39.1	1.75	41.8	0.95	4.5	39.7	0.5	59	1.86	3.99	12	36.3
61	30	M	192-30	2.05	3.48	1.64	0	0.72	4.66	57.94	0.82	745	56	81.5	5.9	4.44	980	11.1	18.1	125.8	7.4	0.54	0.1	0.01	0.3	0.02	1.19	2.5	302	323	29	21	11.6	14.2	66.2	101	28.7	10.7	0.77	26	1.55	7.2	40.2	7.4	49	0.92	4.97	12.2	44.5
62	64	F	193-64	2.38	3.64	1.26	0	0.81	1.87	4.31	1.06	196	20	65.3	3.41	4.2	253	12.8	29.8	274.5	6.4	0.33	0.1	0.01	0.7	0.04	1.1	3.7	290	309	30	24.8	3	9.5	81.6	105	32.1	27.5	1.44	36.7	1.22	5.2	44.9	3.3	61	1.22	4.09	12.1	39.1
63	61	F	195-61	1.83	3.07	1.07	0.006	0.77	5.13	189.48	35.2	353	98	88.3	7.17	4.6	484	11.4	20.8	123.5	2.8	0.23	0	0	0.1	0.01	0.98	3.9	266	310	29	21.7	14	10.2	74.8	0	32.6	8.8	0.72	31.2	1.4	8.1	43.6	6	59	1.04	4.34	11.8	34
64	58	F	196-58	1.51	2.85	0.71	0	0.89	1.44	32.68	0.32	220	12	77.5	2.85	3.42	278	11.7	20.2	112.3	5.8	0.21	0	0	0.2	0.01	1.1	3.1	115	322	31	21.9	4.5	9.2	62.3	101	23.2	16.5	0.61	26.2	1.38	3.7	36.1	4.1	44	0.73	4.06	11.4	38.9
65	77	M	197-77	1.9	3.12	1.43	0.024	0.76	1.96	36.3	2.57	181	25	66	3.77	3.53	238	12	21.3	128.9	8.5	0.48	0	0	0.2	0.01	1.03	4.4	468	309	30	22.8	5.1	5	70.5	96	33.4	25.3	1.44	29.3	1.41	5.7	41.2	2.4	61	0.99	4.07	13.7	39.9
66	67	F	198-67	2.95	4.32	1.15	0	0.88	4.1	29.23	0.34	167	21	67.4	3.6	3.25	225	11.1	25	157.7	5.7	0.3	0.4	0.02	0.1	0.01	0.96	3.9	358	323	31	24.1	2.9	8.5	72.4	98	28.1	26.4	1.41	33.5	1.16	5.3	38.9	3	54	1.24	4.13	12.2	39
67	61	M	199-61	1.57	2.72	1.04	0.022	0.76	1.8	1.45	1.02	142	9	60.4	3.09	3.32	168	10.9	19.4	217.6	7.4	0.38	0.2	0.01	3.3	0.17	1.04	6.4	412	303	28	20	1.9	4.1	69.1	112	37.7	28.7	1.47	25.1	1.75	5.1	44	1.9	76	0.95	4.93	13.2	45.7
68	29	F	2-30	2.2	4.25	0.85	0	0.89	5.28	21.64	1.11	163	19	84	6.91	3.26	197	12.1	19.8	80.8	5.8	0.48	0.2	0.02	0.1	0.01	0.94	1.6	176	338	31	22.3	3	7.8	54.1	103	36.4	9.9	0.82	29.6	0.83	8.2	24.5	2.9	91	0.94	4.69	12.7	42.8
69	49	F	20-50	2.46	4.24	1.8	0	1.21	1.92	7.32	0.63	132	19	70.4	3.17	1.04	179	11.6	25.6	192.5	7	0.32	0	0	0.4	0.02	1.02	4.3	259	294	20	22.8	4.6	6	65.1	107	26.2	22.2	1	24.7	1.64	4.5	40.4	2.5	55	1.02	6.43	13.5	44.1
70	41	F	200-41	2.41	4.11	1.12	0.001	1.09	2.13	53.16	0.82	249	17	71.2	2.87	2.98	327	10.9	23.6	125.6	5.5	0.22	0.4	0.02	0.1	0	0.94	3.7	250	307	26	22.9	4.6	6	67.6	102	37.4	22.8	0.92	30.7	1.2	4	36.9	2.5	29	0.99	3.7	12.2	31.5
71	43	M	202-43	1.73	4.13	1.08	0.024	0.91	1.06	26.18	0.24	142	29	72	2.97	1.9	189	12.3	19.1	105.4	9.2	0.38	0.4	0.02	0.1	0	1.07	3.8	201	313	29	24.4	6.1	12.9	66.9	92	37.3	18.3	0.75	34.7	1.65	4.1	34.9	2.2	59	1.18	4.11	11.9	38.2
72	37	F	203-37	1	2	0.78	0	0.7	3.41	49.92	0.39	198	42	69.4	2.08	2.73	284	10.6	21	146.2	3	0.09	0.4	0.01	0.1	0	0.92	2.8	223	312	28	21	1.2	5.5	65.1	103	35.4	27.1	0.81	25.2	1.58	3	39.9	2.6	37	1.07	4.23	12.3	38.3
73	32	M	204-32	1.64	2.52	1.1	0	0.54	2.45	22.99	0.41	233	22	61.3	1.83	2.74	305	12.1	17.5	141.4	5.6	0.17	0	0	0.6	0.02	1.04	4.6	366	325	30	22.1	4.3	10	63.2	99	41.3	32.5	0.97	24	1.63	3	39.2	4	39	0.99	4.62	11.6	42.1
74	26	M	205-26	2.64	3.7	1.37	0.01	0.57	3.39	98.68	0.34	252	45	87.7	4.86	3.34	372	12.4	18.5	106.3	4.7	0.26	0.2	0.01	0.1	0.01	1.18	3.8	436	328	29	19.9	5.3	10.3	67.6	0	23.3	7.3	0.4	28.8	1.35	5.5	38.8	4.4	45	0.64	5.47	12.3	32
75	59	M	206-59	1.65	2.97	0.8	0.001	0.9	16.88	173.03	0.82	283	236	83.7	5.89	2.59	444	12.6	17.6	124.1	4.3	0.3	0	0	0	0	1.04	7.3	308	322	31	25.5	3.3	11.2	72.1	99	33.8	12	0.84	36.1	1	7	36	6.8	123	0.91	4.43	11.9	42.1
76	65	F	209-65	1.91	3.47	1.01	0	1.2	3.37	63.98	0.43	325	49	77.7	3.54	3.07	452	12.6	27	149.6	5.4	0.25	0.1	0	0.3	0.01	0.93	2.9	308	316	28	22.8	1.9	8.5	67.7	94	31.8	16.5	0.75	30	1.26	4.6	37.7	3.5	27	1.24	4.36	12	39.2
77	77	F	213-77	1.93	3.15	0.96	0.019	0.8	1.6	113.21	0.49	345	16	77.3	1.89	1.99	417	12.2	16.6	56.2	11	0.27	0	0	0.2	0	1.05	5	359	326	30	20.6	3.7	10.2	69.8	102	48.7	11.5	0.28	31.6	1.21	2.4	38.2	4.6	60	0.76	4.18	11.4	38.1
78	61	M	214-61	2.45	3.76	1.84	0.045	0.62	1.23	255.66	1.21	406	14	89.9	5.01	2.7	472	12.9	22.6	91.7	1.8	0.1	0.1	0.01	0.1	0.01	1.11	9.9	375	324	30	23.6	3.5	12.7	60.3	106	43.6	8.1	0.45	34.3	0.76	5.6	26	4.8	25	0.94	3.82	13.9	34.9
79	55	M	216-56	1.98	3.98	2.5	0.007	0.89	5.59	90.58	0.91	342	89	81.1	3.85	3	379	11.1	24.6	148.7	5.3	0.25	0.1	0	0.2	0.01	0.96	3.8	280	320	30	25.6	12.2	19.4	76.6	96	36.9	13.3	0.63	32.8	1.34	4.7	43.8	7.3	70	0.96	4.99	11.8	47.1
80	82	M	217-83	1.84	3.12	1.88	0.131	0.61	0.63	152.08	0.62	231	8	90	4.12	1.38	326	12.4	18	212.2	5.4	0.25	0	0	0.1	0	1.07	39.7	491	304	31	11.6	1.8	3.9	58.3	109	53.7	4.5	0.21	26.8	1.18	4.6	31.5	2	39	2.37	3.02	12.9	30.5
81	56	F	223-56	2.51	4.7	2.7	0	1.22	1.87	50.07	0.24	227	19	75.2	3.82	3.1	267	10.6	18.5	178.4	7.5	0.38	0	0	0.2	0.01	0.92	3.7	200	325	31	25.7	5.1	8.5	72.2	96	30.5	17.1	0.87	32.3	1.24	5.1	39.9	2.6	57	1.07	4.74	11.7	45.6
82	62	F	224-63	2.15	4.26	1.29	0.038	1.29	2.37	0.77	1.05	2492	19	86	1.14	1.6	229	14.9	25.2	106.2	3.1	0.49	0	0.01	0.2	0.05	1.02	2.6	146	333	30	24.4	4.2	9.7	58.1	92	35	18.3	1.09	27.1	1.51	3	32.6	3.5	69	0.77	4.35	11.7	42.6
83	52	F	23-52	1.31	2.49	2.01	0.003	0.71	1.44	88.36	0.29	286	11	50.8	1.58	1.9	398	13.8	16.3	86.2	6.2	0.19	0.4	0.01	0.1	0	1.18	4	182	317	29	21.7	7.9	5.5	54	104	53.7	42.5	1.31	21.1	1.56	3.1	32.9	2.6	47	0.69	3.66	11.8	33.8
84	83	M	230-83	1.58	2.84	2.66	0.897	0.53	4.12	60.61	0.34	276	87	88.5	8.69	2.8	351	10.7	19.4	124.7	4.9	0.48	0.1	0.01	0.1	0.01	0.93	18.5	618	324	28	18.8	5.8	8.5	49.4	109	23.8	6.4	0.63	22.4	1.21	9.8	27	5.6	62	1.03	1.7	12.9	14.9
85	62	M	232-62	2.82	4.16	1.82	0.052	0.73	1.7	189.61	1.05	426	53	90.2	6.36	2.9	468	11.5	18.2	84.4	5.3	0.37	0	0	0.1	0.01	0.99	5.6	167	335	34	23.7	25.3	21.1	64.2	95	25.1	4.4	0.31	30.9	1.08	7.1	33.3	9.1	54	0.61	3.92	11.7	40
86	53	F	236-53	2.2	4.16	0.8	0	1.42	4.47	3.27	0.13	150	41	65.6	3.53	2.7	178	11.4	19.9	296.4	13.3	0.72	0.2	0.01	0.2	0.01	0.98	3.1	214	308	29	25.1	2	7.9	74.6	103	29.1	20.7	1.11	33.7	1.21	5.4	40.9	2.6	81	1.23	4.49	12.2	42.5
87	51	M	237-51	2.79	4.07	1.08	0	0.81	1.75	26.94	1.9	256	60	54.1	2.11	3.1	294	11.1	24.6	180	12.6	0.49	0.5	0.02	1.9	0.07	0.96	4.1	310	331	32	25.5	10.3	10.4	64.3	105	24.7	30.9	1.2	31.4	1.05	3.9	32.9	3.7	53	0.94	4.75	11.9	45.3
88	61	M	238-61	2.36	3.81	0.96	0.013	0.89	1.49	15.11	0.3	198	25	64.8	2.25	2.7	231	11.2	18.4	155.6	5.5	0.19	0.3	0.01	0.1	0	0.97	4	213	321	32	24.2	4.1	10	67	96	39.2	29.3	1.01	28.6	1.34	3.5	38.4	3.4	47	0.91	4.6	11.6	45.7
89	49	M	239-49	1.97	3.15	0.94	2.478	0.83	1.36	35.29	0.45	142	29	59.5	2	2.1	189	13	15.7	230.7	12.2	0.41	0.3	0.01	0.1	0	0.94	4	308	316	29	27.1	6.1	12.9	70.7	109	42.7	27.9	0.93	34.7	1.65	3.4	31.4	2.2	59	0.62	4.51	12.1	40.8
90	45	M	24-45	1.8	3.04	0.72	0.002	0.81	1.78	20.43	0.8	208	37	59.2	2.04	2.2	256	12.5	19	139.7	10.8	0.37	0.5	0.02	0	0	1.07	3.6	262	318	30	22.9	2.4	6.4	65.6	106	37.9	29.5	1.01	28.6	1.29	3.4	37	2.9	44	1.22	4.72	12.2	44.1
91	45	F	241-45	2.43	4.45	0.6	0	1.46	1.68	6.56	1.21	226	29	0.472	4.69	2.55	304	11.2	20.5	120.1	8.7	0.77	0.2	0	0.2	0.01	1.15	2.7	107	333	33	24.6	5.1	4.8	70.1	105	35.4	10.6	1.01	28.3	1.48	8	41.8	2.1	58	1.31	3.77	13.2	34.9
92	68	M	245-68	2.7	4.84	0.96	0	1.52	1.95	128.07	1.16	318	29	77.8	6.19	4.3	417	11.9	19.1	107.7	5.6	0.45	0.1	0.01	0	0	1.01	4.2	308	323	30	24.6	10	9.5	75.6	102	36.8	16.5	1.31	39.9	0.89	8	35.7	3.8	53	0.91	4.09	12.1	38.5
93	63	F	246-63	2.31	3.73	1	0.03	0.84	1.1	47.45	0.23	221	24	56.9	1.9	2.5	259	12.2	20.5	55.6	8.5	0.28	0	0	2.1	0.07	1.04	2.5	284	323	31	27.4	5.4	10	60.3	106	28.8	32.5	1.08	31.9	0.89	3.3	28.4	4.2	46	1.11	3.99	11.2	38.3
94	60	M	247-60	2.95	4.23	1.47	0.006	0.74	2.11	5.92	2.23	239	16	64.6	2.68	2.4	269	12.3	15.7	175.9	9.2	0.38	0.1	0	0.5	0.02	1.82	3	212	324	30	24.8	7.9	9.6	67.4	103	35.7	25.6	1.06	29.2	1.31	4.1	38.2	3.9	61	1.05	4.53	11.4	41.8
95	60	F	248-60	1.9	3.49	0.75	0	1.18	1.99	5.65	35.2	148	16	55.2	1.52	1.7	174	12.3	20.2	182	7.8	0.21	0.2	0.01	0.4	0.01	1.06	4.2	259	312	30	25.3	5.4	8.3	65.1	106	24.7	36.4	1	28.8	1.26	2.8	36.3	2.7	46	1.25	3.81	12.4	36
96	52	F	250-53	3.57	5.35	2.67	0.007	0.96	3.88	47.01	1	233	71	62	2.02	2.5	296	11	18.8	186.6	7.4	0.24	0.2	0.01	0.1	0	0.95	4.7	299	318	31	25.7	8.9	6.4	66.5	105	29.7	30.3	0.98	30.3	1.19	3.3	36.2	2.9	48	0.96	3.44	11.7	33.7
97	56	F	251-56	1.2	1.98	0.94	0.038	0.45	3.31	232.12	1.41	529	36	80.2	5.29	3.5	694	12.3	19.2	46.6	3.5	0.23	0	0	0	0	1.06	2.7	266	307	34	23.5	6.2	11.5	68.6	107	42.7	16.3	1.08	37.4	0.83	6.6	31.2	7.1	88	1.15	3.66	13.7	40.9
98	25	M	252-25	2.35	4.25	0.85	0.002	1.38	0.86	0.02	0.13	126	12	86.3	13.7	4.02	161	11	20.5	345.4	3.1	0.49	0.1	0.02	0.2	0.03	0.95	4.3	314	336	31	22.2	6.3	9.2	80.4	107	26.5	10.3	1.63	27.2	1.96	15.9	53.2	3.2	54	0.91	5.5	11.4	50.2
99	43	F	253-43	2.21	3.38	0.84	0	0.76	2.33	15.12	0.55	251	18	54.5	1.63	2.49	349	10.8	19	132.6	7.4	0.22	0.3	0.01	0.3	0.01	0.93	3	202	312	25	23.9	3.5	4.8	73.7	99	27.2	37.5	1.12	31	1.38	3	42.7	2.3	46	1.12	4.79	12.8	38.6
100	42	M	254-42	1.85	3.11	1.3	0	0.84	3.5	22.09	0.26	368	21	72.4	3.52	3.52	530	11.1	18.6	186.5	4.8	0.23	0.2	0.01	0	0	0.96	4.2	356	330	30	18.2	4.3	11.9	68.5	101	33	22.6	1.1	25	1.74	4.9	43.5	4.3	42	0.96	5.22	11.9	47.8
101	49	M	256-49	1.39	2.67	0.72	0	0.86	4.7	72.2	0.31	276	44	67.3	3.08	2.72	390	12.1	24.6	82.2	10.4	0.47	0.1	0	0	0	1.04	3.8	147	318	30	25.3	7.3	5.5	64	103	46.8	22.2	1.01	25.5	1.51	4.6	38.5	2.6	18	0.91	4.42	11.2	41.6
102	69	M	257-69	2.89	4.4	1.86	0.033	0.78	2.65	125.8	0.63	358	33	61.2	2.65	2.9	453	11.9	21.4	134.4	5.4	0.23	0	0	0	0	1.02	8.7	429	327	30	21.1	3.4	8.6	78.1	99	31.3	33.4	1.45	41.1	0.9	4.3	37	3.3	45	1.12	5.13	12.1	47.2
103	62	M	258-62	2.75	4.39	2.35	0.011	1	7.74	83.13	0.43	343	76	79.7	4.5	3.1	423	11.4	18.3	155.9	7.3	0.41	0.3	0.02	0	0	0.98	7.9	553	327	30	24.4	10.1	8.9	73.8	99	38.4	12.7	0.72	34.1	1.16	5.7	39.7	3.5	85	0.7	4.28	12.5	39.1
104	59	F	259-59	3.4	5.31	1.88	0.004	1.23	1.6	24.19	0.21	186	19	66.2	3.61	3.5	220	10.7	18.5	153.2	6.9	0.38	0.4	0.02	0.4	0.02	0.93	3.1	215	310	29	19.8	6.1	7	72.4	105	25.5	26.1	1.43	35.5	1.04	5.5	36.9	2.5	88	1.21	4.3	12.3	39.8
105	60	M	26-60	2.74	4.16	0.73	0	0.91	2.14	29.93	0.31	178	12	73.6	4.82	3.81	213	11.7	19.5	143.1	5.6	0.37	0.1	0.01	0.2	0.01	1.01	6.2	307	324	31	21.1	12.7	9.9	73.6	106	30.9	20.5	1.34	28.6	1.57	6.6	45	4	67	0.99	4.97	12.5	47.2
106	58	M	260-57	1.47	2.69	1.1	0.005	0.85	2.26	21.34	0.33	163	46	65.4	2.08	3.4	211	11.9	17.1	185.7	7.8	0.25	0.2	0.01	0.2	0.01	1.02	5.9	256	317	31	24	6.5	6.6	64.5	102	37.7	26.4	0.84	30.6	1.11	3.2	33.9	2.7	93	1.08	3.59	11.8	35.3
107	73	M	262-72	2.54	3.84	1.73	0.021	0.69	3.38	137.08	0.67	379	30	90.9	5.12	3.3	447	11.7	19.2	88.9	2.2	0.12	0	0	0	0	1.01	7.6	403	334	31	23.6	10.2	12.1	61.3	95	35.4	6.9	0.39	31.7	0.93	5.6	29.6	5.6	46	0.55	5	11.8	46.9
108	62	F	263-62	2.24	3.84	1.71	0	0.99	1.75	17	0.32	195	20	68.6	4.76	4.7	208	11.6	25	166.6	8.3	0.58	0.2	0.01	1	0.07	1	3.7	285	307	28	26	5.7	7.2	70.7	103	28.8	21.9	1.52	32.6	1.17	6.9	38.1	2.7	71	1.04	4.12	11.7	38
109	72	M	265-72	2.24	3.58	1.4	0.003	0.8	8.73	194.07	1.16	304	304	89.5	8.81	3.8	363	11.5	18.5	90.7	3.5	0.34	0	0	0.2	0.02	0.99	8.7	263	322	30	21.8	26.7	21.3	68.8	94	35	6.8	0.67	37.5	0.83	9.8	31.3	14	137	0.84	4.41	12.1	41.5
110	35	M	266-34	1.69	3.18	1.27	0.002	1.15	1.89	10.15	0.31	186	16	62.9	3.64	2.1	228	11.6	17.7	202.9	5.9	0.34	0.2	0.01	0	0	1	3.3	302	319	28	23.4	5.1	5.9	71.4	100	30.4	31	1.79	29.7	1.4	5.8	41.7	2.4	43	0.93	5.1	12.1	44.2
111	55	M	267-55	2.14	3.38	1.29	0.001	0.89	1.06	11.37	0.46	189	10	50.9	3.64	3.5	621	11.4	22	105.4	9.5	0.47	0	0	0	0.01	1	3.8	201	333	27	27.1	2.1	9.7	66.9	109	39.2	26.4	0.88	28.6	1.19	2.3	34.9	4.6	55	1.15	3.66	12.1	41.3
112	46	M	268-46	2.04	3.2	1.01	0	0.72	1.45	67.05	0.72	215	33	70.2	3.66	2.6	254	12.1	18.7	126.2	9.3	0.49	0	0	0.1	0.01	1.04	4.1	284	326	29	25.5	9.3	10.4	67.4	96	34.1	20.4	1.07	32.7	1.06	5.2	34.7	4	64	0.97	4.83	10.7	42.3
113	53	F	27-53	3.24	4.73	1.63	0.001	0.83	1.24	7.53	0.55	220	14	54.7	2.08	2.19	280	11.5	28.6	113.3	10.8	0.41	0.5	0.02	0.3	0.01	0.99	3.6	181	316	30	21.2	3.9	6.4	66.3	109	31.4	33.7	1.28	29.9	1.22	3.8	36.4	2.3	50	1	4.32	12.1	40.9
114	41	F	270-41	1.18	2.69	2.7	0.002	1.24	1.39	7.92	0.59	155	254	93.3	2.21	2.6	980	12.7	22.1	159.6	6.9	0.31	0.4	0	0.7	0.02	1.01	3	251	325	28	24.2	9.1	7.8	66	102	46.8	22	0.76	26.7	1.07	5.5	40.4	2.4	59	1.07	4.46	12.1	34.5
115	34	M	275-34	1.41	3.06	1.39	0.011	1.03	4.93	103.89	1.24	451	55	77.8	3.72	2.4	753	11.9	17.3	93	4.8	0.23	0	0	0.1	0	1.02	3.8	182	315	30	25	20.6	7.2	68.9	98	29.7	17.3	0.83	31.8	1.17	4.8	37.1	3.5	72	1.23	4.44	11.6	42.4
116	67	F	276-68	1.94	3.48	1.09	0.001	1.02	4.2	60.78	0.31	183	34	73.5	3.78	2.2	238	11.2	19.2	143.9	7.2	0.37	0.3	0.02	0.1	0.01	0.97	3.4	306	311	29	27.7	2.6	6.7	70.8	102	29.3	18.9	0.98	32.7	1.17	70	38.1	2.9	131	1.02	14.6	12.3	43.3
117	50	F	277-50	1.82	3.3	1.03	0	1.02	1.45	67.53	0.7	278	19	64.1	1.92	1.3	333	11.2	21.1	97.2	3.6	0.11	0.2	0.01	0.2	0.01	0.97	2.8	204	323	29	22.6	10.4	6.5	65.3	103	28.6	31.9	0.96	32.5	1.01	3	32.8	2.4	45	0.98	4.12	11.8	37.2
118	48	F	279-48	3.18	5.37	0.96	0	1.62	1.71	36.24	0.82	159	13	65.7	1.56	1.8	194	11.4	18.1	186.5	1.8	0.54	0.2	0.01	0.4	0.07	1.02	2.3	252	334	28	26	8.2	7	75.8	100	33.3	15.8	0.96	34.7	1.18	4.5	41.1	2.5	54	1.14	4.62	12.5	35.3
119	48	F	28-49	1.88	3.13	1.14	0	0.79	1.54	4.16	0.2	135	13	52.3	2	2.8	152	11.8	22.4	140.4	13.4	0.51	0.5	0.02	0.2	0.01	1.02	2.7	224	323	31	24.1	4.3	6.3	65.9	105	31.5	33.6	1.28	30.5	1.16	3.8	35.4	2.3	37	0.94	4.13	11.3	39.1
120	35	F	281-35	2.08	3.79	4.61	0.002	0.75	4.72	73.63	0.53	207	68	84.7	6.01	2.1	258	11.1	25.2	98.9	5.2	0.37	0.3	0.02	0.1	0.01	1.02	2.8	337	318	28	18.9	5	6.7	52.4	107	25.1	9.7	0.69	30.3	0.73	7.1	22.1	4.4	147	1.15	3.8	13.4	33.2
121	39	F	285-39	1.98	3.2	0.99	0	0.72	1.98	50.14	0.24	193	27	63.9	3.35	2.8	233	11.7	17.4	148	9.3	0.49	0.2	0.01	1.3	0.07	1.01	1.9	271	313	29	25.7	4.1	10.2	67.9	101	29	25.3	1.33	31.5	1.16	5.3	36.4	3.5	39	1.12	4.32	11.9	40
122	56	M	289-56	2.92	4.25	2.66	0	1.03	6.59	44.14	0.25	129	101	73.8	2.42	2.6	156	11.3	22.8	153.5	6.5	0.21	0	0	0	0	0.98	4.1	270	315	30	25.8	7.5	8.3	66.3	109	38.8	19.7	0.65	32.1	1.07	6.9	34.2	3.7	87	1	0	11.8	41.2
123	71	F	29-71	2.27	3.44	1.4	2.478	0.61	1.66	108.39	6.63	718	43	80.4	7.34	3.44	1161	14.9	22.6	119.3	7.1	0.65	0.1	0.01	0	0	1.27	7.2	412	323	29	20.9	2.5	12.1	66.9	99	31.6	12.4	1.13	32.9	1.03	9.1	34	6	49	1.05	3.96	12.5	35.7
124	29	F	290-29	2.64	4.44	0.87	0	1.37	1.92	4.61	0.36	160	14	62.3	3.59	2.2	181	11.6	19.4	213.3	5.8	0.33	0.2	0.01	0	0	1	3.5	325	315	28	22.8	4.5	5.9	71.8	103	33.8	31.7	1.83	28.8	1.49	125	43	2.2	70	1.36	4.82	11.6	43.3
125	27	M	293-27	1.78	2.96	0.71	0.004	0.75	2.41	23.7	0.22	259	29	75.8	3.54	3	327	11.6	17.7	187.8	7.7	0.36	0.1	0	0.1	0	1	5.4	352	328	28	24.4	10.1	18.4	74.1	96	33.9	16.3	0.76	31.9	1.32	4.7	42.2	7.5	66	1.06	5.12	11.8	43.9
126	52	M	294-52	3.33	4.81	0.88	0	0.95	2.5	22.55	0.18	182	33	57.5	1.42	1.8	206	11.3	22.8	148.9	7.7	0.19	0.2	0	0.1	0	0.98	6.5	244	327	29	24.5	4.5	7.4	66.2	103	25.4	34.5	0.85	30	1.21	2.5	36.2	2.5	67	1.11	4.55	11.4	40.1
127	63	M	296-63	2.2	3.6	0.88	0.013	0.98	1.17	73.89	0.51	115	20	77	4.28	1.5	150	11.9	19.9	160	7.2	0.4	0.1	0.01	0.1	0.01	1.02	8.2	274	326	33	20.7	6.2	3.7	66	92	43	15.6	0.87	24.9	1.65	5.6	41.1	1.7	40	1.31	3.32	12.4	33.3
128	74	M	297-74	2.11	3.73	0.8	0.03	1.03	1.67	35.9	0.33	291	23	69	3.26	3	385	11.3	19.5	117	12.5	0.59	0.2	0.01	0	0	0.98	6.7	255	323	29	24.8	5.8	6.3	61.3	98	31.6	18.3	0.86	29.2	1.1	4.7	32.1	2.8	47	1.06	4.64	12	41.7
129	82	F	298-82	2.19	3.61	0.87	0.039	0.97	1.18	7.92	2.08	118	20	71.7	3.85	1.43	150	11.1	15.7	160.8	7.4	0.45	0.1	0	0.1	0.01	0.96	8.2	273	317	29	21.5	6.2	3.5	65.9	93	30.8	22.7	0.51	24.9	1.65	3.3	41	1.7	41	1.33	4.46	12.1	40.9
130	60	M	3-60	1.46	2.88	1.89	0	0.86	3.62	7.64	0.26	184	34	65.5	3.44	3.9	214	12.1	22.6	248.1	10	0.53	0.2	0.01	0.1	0.01	0.96	6	458	318	31	26.6	4	6.5	66.1	102	29	24.2	1.28	26	1.54	5.5	40.1	3.1	58	1.59	3.76	12	48.3
131	75	M	30-75	1.42	2.79	0.9	0.038	0.9	1.87	70.26	0.51	310	18	50	1.74	2.9	364	12.3	18.7	91.4	11.7	0.41	0	0	0	0	1.06	7.2	433	321	29	24.3	13	11.3	65.6	101	38	38.3	1.34	31.4	1.09	3.5	34.2	5.4	72	0.84	4.51	13.2	40.4
132	63	F	300-63	2.27	3.91	1.53	0.018	1.05	2.98	10.25	0.56	188	30	69.6	2.53	2	233	11.6	27	106.3	9.4	0.34	0.4	0.01	0	0	1	4.9	164	338	32	26.5	2.3	4.9	65	104	29.5	20.6	0.75	32.9	0.98	3.6	32.1	1.9	69	0.86	3.79	12.3	35.7
133	72	F	302-72	1.61	2.78	0.54	0	0.83	1.44	43.68	0.51	216	18	68.8	3.66	2.8	270	12.4	25.6	143.3	9	0.48	0.1	0.01	0	0	1.07	4.5	265	338	31	25	8.3	7.8	69.5	101	35.6	22.1	1.18	32.6	1.13	4	36.9	3.3	45	0.92	33.4	11.5	37.4
134	64	F	305-64	2.79	4.25	1.25	0.01	0.94	13.9	97.87	6.63	252	296	80.8	5.18	2.2	355	12.6	18.2	116.1	5	0.32	0.1	0.01	0.1	0.01	0.93	2.5	318	337	30	23.5	3.4	7.8	67.4	104	31.8	14	0.9	34.5	0.95	6.4	32.9	3	123	1.06	4.22	11.9	37.8
135	45	M	306-45	2.84	4.44	1.86	0	0.92	1.79	2.83	0.13	145	24	78.7	3.57	2.4	210	11.9	19.1	287.1	7.6	0.34	0.3	0.01	0	0	1.02	5.2	330	316	30	24.5	6.7	8.5	81.4	98	30.7	13.4	0.61	35.9	1.27	4.5	45.5	2.6	59	1.08	4.94	11.2	47.2
136	85	F	308-85	2.58	4.39	0.87	0.029	1.26	2.39	83.01	0.59	231	16	75.8	3.27	2.4	277	11.5	18.5	105.4	7.2	0.31	0	0	0	0	0.99	5	300	341	31	23.8	9.4	6.2	62.8	104	32.6	17	0.73	32.4	0.94	4.3	30.4	2.3	40	1.2	4.28	12.1	39.4
137	45	M	310-45	1.96	3.56	0.75	0	1.11	2.16	49.59	0.26	245	21	78.9	3.4	2.2	292	12.4	19.1	130.1	10.8	0.47	0.2	0.01	0	0	1.07	2.3	270	327	28	22.6	5.1	9	60.2	92	33.5	10.1	0.44	24.2	1.49	4.3	36	3.4	55	1	4.53	12.5	39.1
138	43	M	313-43	1.63	3.03	1.25	0.409	0.72	19.76	139.18	1.12	363	389	92.2	5	1.2	512	12.4	21.4	193.7	3.3	0.18	0	0	0.2	0.01	1.07	45.6	674	315	28	14.8	14.4	14	80.5	95	45.8	4.3	0.23	45.1	0.78	5.4	35.4	11	268	3.79	4.09	11.3	35.6
139	72	F	316-72	3.07	5.22	0.96	0.012	1.48	1.34	23.28	0.25	178	13	51.9	2.25	2.5	216	13.8	17.6	154.6	8.5	0.37	0.2	0.01	0.1	0	1.04	2.9	192	308	24	25.7	8	4	73.2	98	35.6	39.3	1.7	33.5	1.19	4.3	39.7	1.9	57	1.12	4.66	13.6	36.9
140	57	F	317-58	1.54	2.6	0.94	0	0.7	5.95	21.46	0.24	190	27	72	3.79	2.5	231	11.8	25.4	125.9	6.9	0.36	0.2	0.01	0	0	1.02	3.7	286	316	29	23.2	2.4	12.6	68.3	101	30.3	20.9	1.1	33	1.07	5.3	35.3	5.2	71	1.04	4.41	11.8	40.1
141	67	M	318-67	2.3	3.61	1.05	0.011	0.73	1.81	137.44	2.13	283	33	70.7	1.52	1.7	345	12.1	16.4	114.5	4.6	0.1	0.4	0.01	0.2	0	1.04	3	235	309	35	26.3	4	12.8	62.6	99	29.5	24.1	0.52	28.6	1.19	2.2	34	4.1	69	0.49	1.94	14.1	22.1
142	27	M	32-27	1.63	2.76	0.62	0	0.78	1.45	9.96	0.14	101	30	69.9	2.23	0.95	148	12.9	16.7	181.6	9.9	0.31	0	0	0.1	0	1.11	4.2	324	326	28	23.8	2.1	7.2	65.8	103	36.6	20.1	0.64	21.2	2.1	3.2	44.6	3.2	55	0.97	4.65	11.4	40.6
143	66	F	321-66	1.7	3.36	0.98	0.033	1.13	3.36	203.48	35.2	280	35	89.6	7.17	2	335	13	17.7	106.1	1.7	0.14	0.1	0.01	0	0	0.95	5.1	214	309	28	22.1	12.7	10.3	68.7	102	29.7	8.6	0.69	35.5	0.94	8	33.2	4	75	0.83	4.43	11.9	40.2
144	66	F	326-66	1.97	3.63	0.96	0.014	1.13	3.56	46.26	0.39	189	37	76.5	3.63	1.9	238	11.6	21.2	119.2	8.4	0.4	0.2	0.01	0.1	0	1	5	257	314	31	26.1	10.4	5.9	66.7	105	31.9	14.8	0.7	31.5	1.12	4.7	35.2	2.2	73	0.81	3.82	11.7	37.1
145	56	M	33-56	2.55	4.12	1.73	0	0.92	10.72	40.44	0.15	184	252	72.6	4.6	3.6	220	21.7	17.8	160.6	12.1	0.77	0	0	0.4	0.03	1.82	3.9	317	325	30	21.8	4.2	9.4	70.9	97	55.6	14.9	0.94	33.8	1.1	6.3	37.1	3.7	128	1.05	5.07	11.3	47
146	63	M	332-64	2.26	3.81	1.13	0	1.08	2.27	17.25	0.21	176	24	59.8	2.11	2.7	216	12.7	16.4	139.6	8.1	0.29	0.2	0.01	0.3	0.01	1.09	4.7	202	313	30	21.7	6.6	5.6	67	106	39	31.6	1.12	33.3	1.01	3.5	33.7	2.7	51	0.75	4.1	12.4	39.7
147	52	F	336-52	2.82	4.3	1.05	0	0.99	1.92	71.72	0.41	235	21	70.4	5.44	3	272	12.3	27.6	94.7	9.2	0.71	0.1	0.01	1.4	0.11	1.06	3.1	217	327	33	22.6	1.5	12.9	63	109	30.5	18.9	1.46	32.5	0.94	15	30.5	5.2	41	0.99	2.24	11.9	22.3
148	75	M	337-75	2.74	4.08	1.69	0.008	0.68	1.16	50.99	0.66	324	40	91.6	7.78	4.1	355	12.6	23.6	94.9	2.4	0.2	0	0	0	0	1.08	9.6	223	321	30	23	3.6	6.2	58.6	110	33.6	6	0.51	31.3	0.87	8.5	27.3	2.7	55	1.03	4.27	11.4	39.3
149	51	F	339-51	2.23	3.64	1.37	0.001	0.86	3.16	9.93	1.16	188	41	51.7	1.82	2.3	237	11.2	24.6	159.1	8.8	0.31	0.9	0.03	1.2	0.04	1.15	3	252	331	30	27.5	4.4	4.3	65.9	106	35.4	37.4	1.31	30.6	1.15	3.5	35.3	1.9	70	1.11	4.1	11.9	37.6
150	51	F	343-51	1.75	2.96	0.81	0.002	0.74	1.07	36.53	1.64	160	26	76.5	6.62	1.8	161	13.2	18.8	158.5	6.3	0.55	0.2	0.02	1.7	0.15	1.13	2.1	154	306	32	26.5	6.7	10.6	65.4	112	34.6	15.3	1.33	34.2	0.91	8.7	31.2	3.4	112	0.55	3.95	15.7	41.1
151	43	M	346-43	1.67	2.84	0.67	0	0.88	1.93	50.39	0.43	207	20	50.4	1.03	2.53	276	11.6	17.9	139.5	15.9	0.32	0.2	0	0.2	0	1	5.9	210	333	29	20.1	5	5.6	75.2	107	41.6	33.3	0.68	32.8	1.29	2	42.4	2.7	77	1.29	4.47	12.8	38.7
152	53	F	347-53	2.38	4.28	1.11	0	1.37	2.37	17.17	0.25	164	46	70.5	5.93	3	202	11.7	20.5	194.6	9.8	0.83	0.2	0.02	0	0	1.01	3.4	218	318	29	23.4	2	10.1	68.8	101	29.3	19.5	1.64	30.8	1.23	8.4	38	3.5	63	1.39	4.79	11.7	44.1
153	33	F	348-33	1.58	2.72	0.94	0.001	0.76	1.19	6.22	0.35	161	10	49	1.37	2.8	191	11.6	17.9	181.8	7.3	0.21	0.7	0.02	0	0	1	3.4	166	316	30	26.3	3.7	3.4	63.3	114	27.8	43	1.21	26.5	1.39	2.8	36.8	1.9	42	1.06	4.1	11.3	38.5
154	29	M	351-29	3.01	4.74	2.24	0.045	1.01	4.2	83.4	0.28	497	52	77.3	4.68	2.3	621	12.4	21.4	170	7.5	0.45	0.2	0.01	0.7	0.04	0.98	5.1	441	320	29	23.5	9.2	10.5	66.3	101	29.5	14.3	0.87	30.7	1.16	6.1	35.6	4.1	48	0.9	5.05	11.9	45.6
155	62	M	352-62	1.73	3.31	2.67	0	0.76	1.19	15.81	0.2	144	30	72.2	6.75	1.9	189	11.3	20.5	219.3	6.9	0.64	0.2	0.02	2.3	0.21	0.98	7.3	295	326	30	21.3	4.6	7.4	63.4	109	28.7	18.4	1.72	23.7	1.68	9.3	39.7	2.9	78	1.18	4.46	12	41.7
156	51	M	353-51	2.47	4.13	1.51	0.203	0.98	0.96	204.48	2.23	219	6	95.8	3.76	1.44	306	12.4	18.9	210.1	0.8	0.03	0.1	0	0	0	1.07	53.7	532	307	25	13.2	2.2	1.8	66.8	102	53.8	3.3	0.13	30.8	1.17	3.9	36	1	55	3.53	3.1	14.1	25.4
157	66	M	363-66	3.23	4.61	1.65	0.002	0.72	2.28	9.27	0.77	238	152	0.654	3.69	3.9	280	12.2	29.4	243	0.088	0.5	0.008	0.05	0.021	0.12	1.05	4.5	336	335	32	23	6.9	9	64.4	108	26.8	0.229	1.3	30.9	1.08	5.7	33.5	3.2	70	1.12	4.21	11.7	0.4
158	40	M	365-40	4.45	6.19	2	0.006	1.13	3.99	36.67	0.35	222	67	71.2	3.42	3.24	315	11.1	24.4	203.4	9	0.43	0.3	0.01	0	0	0.96	4.3	306	333	31	23.1	2.2	6.6	70.6	97	24.5	19.5	0.94	33	1.14	4.8	37.6	3.1	53	1.19	4.87	11.4	45
159	57	F	366-57	3.2	4.62	1.3	0	0.95	1.57	11.11	2.11	235	30	76.5	4.45	2.8	290	11.2	25.2	258	7.5	0.44	0.1	0.01	0.1	0.01	0.97	4.8	238	340	33	20.9	0.8	8.1	65.9	105	24.6	15.8	0.92	29.7	1.22	5.8	36.2	2.7	55	0.8	3.7	11.6	35.7
160	64	M	367-64	3.92	5.5	2.22	0	0.89	1.93	11.37	0.59	153	19	75.2	6.87	2.74	214	11.9	21.4	192.1	7.2	0.66	0	0	2.4	0.22	1.02	4	295	317	31	24.9	1.8	7.9	69.8	102	30.9	15.2	1.39	28.4	1.46	9.1	41.4	2.2	63	1.12	3.95	12	38.7
161	64	M	368-64	2.86	4.02	1.42	0	0.6	1.29	16.21	0.37	145	19	58.7	1.93	2.8	164	12.6	21	154.2	10.1	0.33	0.2	0.01	5.5	0.18	1.08	3.6	224	334	33	27.9	2.8	15.4	63	105	32.4	25.5	0.84	31.6	0.99	3.3	31.4	3.7	56	1.06	4.06	12.1	40.6
162	68	F	37-68	2.54	3.75	0.96	0	0.67	2.47	36.4	0.2	174	20	67.2	3.83	4.5	192	11.1	19.4	125.8	6.4	0.36	0	0	0	0	1.13	13.9	440	316	27	20.3	3.8	7.8	71.6	102	41.6	26.4	1.5	35.9	0.99	5.7	35.7	3.1	57	0.97	4.71	14.2	40.8
163	46	M	370-46	1.75	3.08	1.14	0.002	0.9	0.91	0.77	0.79	174	15	68.4	3.05	2.2	218	13.9	17.7	233.1	6.6	0.29	0.4	0.02	0.9	0.04	1.04	4.9	267	337	33	25.3	0.8	7	61.4	106	34.2	23.7	1.05	22.9	1.68	4.5	38.5	2.6	45	0.84	4.63	11.5	44.8
164	67	M	372-67	2.44	3.73	0.68	0.013	0.88	5.26	62.78	0.55	125	78	76.5	5.43	3.5	185	12.5	21.4	131.5	7.7	0.55	0.2	0.01	0.4	0.03	1.07	5.8	246	305	28	26.4	5.3	10.1	70	105	32.4	15.2	1.08	34.5	1.03	7.1	35.5	3.8	129	1.29	4.21	11.3	39.3
165	72	M	373-72	1.62	2.69	1.19	0	0.66	1.94	21.86	0.68	199	59	79.9	7.24	2.52	261	11.6	21.1	92.8	6	0.54	0.3	0.03	0	0	1.11	7.1	297	347	35	20	3.4	10.4	61.4	106	30.7	13.8	1.25	32.1	0.91	9.1	29.3	4.8	46	0.94	3.9	12.5	38.8
166	70	F	375-70	3.06	4.44	2.65	0	0.65	8.42	28.79	3.95	179	254	77.1	2.86	2.33	254	12.6	23.4	234.8	7.4	0.27	0.4	0.01	0.2	0.01	1.08	5.4	254	311	27	24.9	3.3	6.6	73.8	104	31.8	14.9	0.55	34.6	1.13	3.7	39.2	3.2	125	1.31	3.84	12.2	33.2
167	37	M	376-37	2.73	3.77	1.08	0.027	0.6	2.03	34.25	0.49	164	19	71.7	2.48	2.55	227	12.4	19.2	139.2	5.9	0.2	0	0	0.2	0.01	1.28	3.4	310	306	23	24.8	1.6	5.4	72.3	100	29.7	22.2	0.77	30.2	1.39	3.5	42.1	2.5	72	1.16	6.17	13	47.2
168	59	F	379-59	2.85	4.27	1.18	0.004	0.89	1.96	6.92	0.51	155	66	69	5.18	2.43	229	12.1	19.9	139	6.7	0.5	0	0	1.5	0.11	1.04	4	184	325	30	23.5	4	10.7	70.9	107	26.6	22.8	1.71	31.8	1.23	7.5	39.1	3.6	64	0.98	4.03	11.2	37.1
169	80	F	38-80	2.49	4.68	1.01	0	1.56	1.05	7.92	0.26	143	8	65.2	1.85	0.88	177	12	16.7	129.7	11.9	0.34	0.2	0.01	0.7	0.02	1.03	5.6	249	321	28	24.4	1	7	70.3	102	29.7	22	0.62	27.8	1.53	2.8	42.5	2.4	59	1.06	4.27	11.7	37.2
170	60	F	381-61	1.6	3.41	1.11	0.009	1.3	0.72	195.51	0.95	217	16	96.8	19.4	4.13	268	10.8	21.4	117.3	2.2	0.44	0	0	0	0	1.04	4	159	306	29	22.2	14.4	7.9	66.3	105	31.5	1	0.2	31.8	1.08	20	34.5	2.4	45	0.63	3.75	11.9	35.4
171	32	M	382-32	3.46	5	1.93	0	0.99	1.78	48.8	0.59	255	64	82	7.15	2.35	307	11.8	27.4	222.2	5.4	0.47	0	0	0	0	1.02	4.6	308	315	30	23.9	0.9	9.5	70	107	24.5	12.6	1.1	32.3	1.17	8.7	37.7	3.4	40	1	4.58	12.3	42.8
172	77	F	387-77	1.72	3.29	0.76	0.028	1.1	1.39	6.7	6.65	175	13	36	0.62	1.9	189	10.7	19.8	98.5	8	0.14	0.1	0	0.3	0.01	0.93	9.4	275	310	30	23.5	3.6	9.6	61.6	105	23.7	55.6	0.97	29.2	1.11	1.7	32.4	3.8	40	1.24	3.37	13.6	32
173	30	F	389-30	1.7	2.95	0.56	0	0.9	1.07	0.45	0.21	105	9	63	3.33	1.8	121	11.1	16.4	170.3	6.6	0.35	0.3	0.02	1.1	0.06	1	3.7	234	339	32	25.4	2.1	8	64.3	107	26.5	29	1.54	27.5	1.34	5.3	36.8	2.9	45	1.24	3.93	12.2	37.1
174	59	F	39-59	3.32	5.29	1.78	0	1.36	2.76	15.26	0.24	213	16	40	1.67	3.6	242	11.9	20.7	101	8.1	0.34	0.2	0.01	0.3	0.01	1.02	3	213	321	31	22.4	3	9.7	71.7	103	29.5	51.4	2.15	33	1.17	4.2	38.7	3.3	80	1	4.27	12.2	41.2
175	92	M	391-92	2.83	4.45	1.29	0.058	0.9	2.65	82.81	2.99	244	36	89	8	2.9	272	11.3	20.5	129.7	3.9	0.35	0	0	0	0	0.98	7	258	316	29	28.8	6.1	6.1	64.4	101	32.8	7.1	0.64	35.7	0.8	9	28.7	1.7	119	0.91	4.54	14.6	41
176	49	F	394-49	2.59	4.4	0.84	0.014	1.21	1.54	12.61	0.26	161	15	72.3	3.12	2.4	180	11.4	20.9	253.8	10.8	0.47	0	0	0.1	0	1.02	5.5	216	325	31	29.2	4.1	5.8	81.2	101	33.3	16.8	0.73	35.4	1.29	4.3	45.8	2.5	63	1.18	4.29	11.8	40.6
177	58	F	397-58	3.17	4.63	2.41	0	0.75	1.07	21.15	0.53	392	34	84.7	7.35	3.3	436	11.1	17.7	228.6	3	0.26	0.1	0.01	1.6	0.14	1.19	6.8	155	308	27	26.9	1.3	13.9	68.2	107	28.7	10.6	0.92	39.3	0.74	8.7	28.9	4	69	0.77	5.05	12.1	44.3
178	30	F	2020-04-30	2.88	2.53	0.88	0	1.11	2.06	36.24	0.2	118	14	75.2	1.52	2.52	170	11.6	17.6	277.4	10.8	0.41	0.2	0	0	0	1	3.4	176	319	30	22.3	4.1	5.1	85	100	26.5	13.9	0.45	34.5	1.46	5.5	50.5	1.9	55	0.86	4.62	13.7	37.9
179	72	M	40-72	1.26	2.46	1.53	0.043	0.75	3.36	36.06	0.37	236	26	61.5	2.31	2.1	297	11.9	19.3	135.1	9.5	0.35	0.1	0	0.1	0	1.02	6.5	285	335	32	19.1	8.5	8.3	60.9	106	35.5	28.8	1.07	26.2	1.32	3.7	34.7	3.5	40	1.33	3.82	11.4	36.5
180	74	F	406-74	2	3.63	1.38	0.762	0.94	1.14	375.17	4.88	839	22	91	10.49	3.5	989	15	21.4	39.2	2	0.23	0	0	0.1	0.01	1.28	11.1	330	309	29	27.2	7.7	20.3	66.4	102	36.3	6.9	0.8	40.5	0.64	11.5	25.9	9.1	108	0.99	4.36	12.7	40.3
181	70	M	409-70	1.18	2.02	1.2	0	0.45	1.02	291.93	1.02	674	37	95.6	11.99	3.71	939	12.4	17.7	16.9	1.2	0.15	0	0	0.1	0.01	1.11	19.6	675	330	30	25.7	7.6	17.8	63.5	101	28.1	3.1	0.39	35.6	0.78	12.5	27.9	10.3	54	1.19	4.62	13	52
182	46	M	41-46	2.92	4.05	1.11	0	0.69	2.28	129.19	1.02	260	47	80.6	4.41	2.91	341	13.2	21.2	85.2	6.2	0.34	0	0	0.2	0.01	1.13	7.3	381	319	29	19.5	3	9.2	62.8	108	31.3	13	0.71	30.8	1.04	5.5	32	4.1	46	0.94	4.3	12	38.6
183	34	F	426-34	1.91	3.1	1.04	0	0.72	1.45	14.15	0.63	146	13	64.5	2.86	2.8	157	10.9	21.9	159.6	6.4	0.28	0.3	0.01	1.6	0.07	1.04	1.8	171	343	33	25.9	3	7	75.1	107	37.7	27.2	1.2	40.3	0.86	4.4	34.8	2.7	48	1.13	3.19	11.3	31
184	70	M	431-70	4.1	5.78	2.36	0.005	0.74	1.53	23.16	3.17	184	44	65.7	3.59	3	210	12.2	23.4	162.2	10.5	0.57	0	0	3.2	0.17	1.05	4.6	252	326	29	21.5	3.1	7.4	68.2	101	31.9	20.6	1.12	39.7	0.72	5.5	28.5	2.8	56	1.17	4.42	12.2	39.9
185	81	M	436-81	2.18	3.69	1.25	0.071	0.71	8.5	78.58	3.21	526	91	69.4	0.97	3.2	634	11.4	23.8	77.4	5.2	0.07	0	0	0	0	0.98	14.9	502	334	33	21.1	7.8	19.8	83.3	105	23.3	25.4	0.35	48.9	0.7	1.4	34.4	9.5	105	1.44	3.96	12.7	38.9
186	39	M	440-39	0.94	2.22	1.53	0.094	0.76	1.85	231.44	2.28	382	21	81.3	3.21	2.5	502	12.8	17.5	139.9	9.6	0.38	0.1	0	0	0	1.1	47.2	773	319	21	9	7	4.9	65.8	101	60.2	9	0.36	31.7	1.08	4	34.1	2.7	107	2.33	6.09	16.8	38
187	26	M	447-26	2.21	3.55	2.31	0.004	0.73	2.47	1.25	0.43	160	72	55.7	2.37	4.1	177	11.1	23.8	402.5	9.5	0.4	0.5	0.02	2.4	0.1	0.96	3.7	156	340	30	23.2	2.5	10.6	66.1	108	31.8	31.9	1.36	23.4	1.82	4.3	42.7	4.5	73	0.86	5.32	13	46.5
188	84	M	448-84	1.24	2.07	1.93	0	0.31	0.67	246.12	0.34	314	20	89.8	17.45	4.5	379	12.1	24	198	5.1	0.99	0	0	2.9	0.56	0.96	8.5	251	328	31	21.6	12.9	10.3	65.7	104	29	2.2	0.43	35.8	0.84	19.4	29.9	5.5	70	1	4.05	12.6	38.7
189	55	M	450-55	2.21	3.92	1.34	0.011	0.98	0.71	150.34	0.85	139	14	92.3	15.74	3.38	175	13.2	18.1	63.8	2.6	0.44	0	0	0	0	1.13	9.9	341	322	27	21.5	0.9	3.9	66.6	94	37.9	5.1	0.87	34.7	0.92	70	31.9	1.7	49	1.36	0.9	14.7	40.5
190	51	F	455-51	2.14	3.82	0.5	0.052	1.29	1.38	0.38	0.55	135	15	59.5	2.18	2.2	144	11.8	21.1	178.9	6.9	0.25	0.3	0.01	0.7	0.03	1.02	6.6	118	328	33	26.7	37.5	7.8	60.7	108	26.6	32.6	1.2	21.8	1.78	3.7	38.9	2.8	45	0.97	3.27	12.5	32.7
191	49	M	47-49	1.87	3.35	0.93	0	0.97	5.33	10.37	0.11	131	83	51.4	2.12	1.98	177	12.2	22.6	211	12.2	0.5	0.2	0.01	0.1	0	1.05	7.3	459	324	29	22.2	1.9	8.9	68	100	29.9	36.1	1.49	29.2	1.33	4.1	38.8	3.8	73	1.08	4.7	12.2	42.6
192	60	M	473-60	2.54	3.88	2.22	0	0.7	1.69	0.4	0.15	152	42	68.7	4.5	4.8	182	12	22.1	421.2	5.1	0.33	0.8	0.05	2.2	0.14	1.03	4.7	450	329	31	25.9	7.5	13.3	72.5	107	32.1	23.2	1.52	23.2	2.13	6.5	49.3	4.4	63	1.18	5.18	12.9	48.3
193	46	F	48-46	2.34	3.62	1.73	0.002	0.72	1.28	36.24	1.24	153	13	56.9	3.4	0.82	199	14.2	19.2	139.8	15.1	0.17	0.003	0.01	0	0.01	0.95	3.9	251	312	30	20.5	5.3	4.9	74.3	106	24.5	29.3	0.87	32.4	1.29	3.3	41.9	2.3	43	0.89	4.62	12.5	35.7
194	51	M	49-51	1.92	3.21	0.97	0.001	0.88	2.77	51.58	1.34	233	29	65	4.02	2.13	301	12.6	20.4	121.7	8	0.5	0	0	0	0	1.08	3	329	320	29	21	6.2	7.9	64.6	104	33.1	27	1.67	28.6	1.26	6.2	36	3.8	54	0.73	5.39	11.8	48
195	56	F	499-56	2.76	3.97	0.93	0	0.81	2.2	45.56	0.34	281	28	61.6	2.08	2	318	11.9	17.6	142.4	9.4	0.32	0.3	0.01	0.6	0.02	1.02	2.6	162	327	31	28.9	2	7	62.7	108	31.4	28.1	0.95	27	1.32	3.4	35.7	2.5	58	0.87	3.37	11.6	32
196	56	F	50-56	1.7	3.05	0.62	0	1.11	1.81	15.16	0.26	161	13	57.7	1.98	2.36	192	11.9	20.9	143.1	9.9	0.34	0.3	0.01	0.3	0.01	1.02	5.1	255	317	29	22.7	6.6	5.1	68.6	109	28.5	31.8	1.09	28.2	1.43	3.4	40.4	2.3	70	1.15	4.19	12.4	39
197	56	F	51-56	2.96	4.13	1.21	0.012	0.68	1.22	21.45	0.34	309	20	67.1	1.92	2.17	443	12.6	19.1	101.5	12.7	0.36	0.2	0.01	0.2	0.01	1.08	3	175	325	28	19	5.8	5.5	62.2	108	30	19.8	0.57	28.6	1.17	2.9	33.6	1.9	69	0.84	4.11	11.2	35.5
198	47	F	52-47	2.06	4.01	0.49	0.01	1.48	1.82	4.71	0.25	134	14	72.8	3.09	2.72	175	14.9	18.2	253.7	9	0.38	0.4	0.02	0.3	0.01	1.02	6.3	185	316	30	24.4	6.1	5	72.9	104	35	17.5	0.74	26.3	1.77	4.2	46.6	2.2	54	1.04	4.3	11.3	41.1
199	59	M	54-59	3.41	4.68	1.15	0.009	0.76	1.06	41.63	0.89	286	12	52.5	1.23	3.31	384	11.8	18.9	93.4	8.5	0.2	0	0	0	0	1.02	3.6	169	324	29	19.6	7	13.8	69.5	96	35.3	39	0.92	31.2	1.23	2.4	38.3	4.9	53	0.7	5.04	11.9	45.3
200	56	F	55-56	2.4	3.51	0.72	0.014	0.72	1.27	58.79	0.26	247	15	71.4	3.08	3.06	317	12.3	21.6	71	5.5	0.24	0.1	0	0.1	0	1.06	2.3	189	322	28	21.9	13.5	10.8	63.5	102	35.1	22.9	0.98	26.4	1.41	4.3	37.1	4.2	47	1.13	4.99	11.5	42.7
201	77	M	551-77	1.25	2.97	1.35	0.001	1.19	0.78	0.15	0.13	103	11	59.2	3.26	3.18	130	11.7	20	250.3	9.5	0.52	0.4	0.02	3	0.16	1.01	3.1	216	313	31	25	3.5	11.1	56.3	107	26.4	27.9	1.53	17.7	2.18	5.5	38.6	3.7	82	0.85	4.71	11.9	45.9
202	46	M	56-46	1.28	2.98	0.76	0.004	1.02	2.48	77.64	0.62	264	45	76.5	5.92	4.8	336	12.8	21.3	106.2	5	0.39	0	0	0.1	0.01	1.1	4.6	194	323	28	22.9	19.6	9.7	66.9	98	29	18.4	1.43	28.5	1.35	7.8	38.4	4.6	37	0.94	4.92	12	42.5
203	73	M	568-73	1.13	2.11	0.5	0	0.69	3.17	168.2	7.01	226	89	85.1	5.21	4.75	280	16	22	77.7	7.2	0.44	0.2	0.01	0.2	0.01	1.36	6.2	316	336	32	19.5	1.2	16.7	62.7	101	37.7	7.3	0.45	36.6	0.71	6.1	26.1	10.1	137	0.85	4.37	12.9	41.1
204	76	F	569-76	1.76	2.79	1.12	0.131	0.59	0.74	102.84	35.2	386	26	94.8	7.81	3.9	492	13.1	19.4	81.3	3.1	0.26	0	0	0.1	0.01	1.12	6.3	245	326	32	26.4	1.6	11.9	54.1	106	28.6	2	0.16	28.3	0.91	8.2	25.8	4.8	67	0.85	3.45	13.7	33.9
205	40	M	57-40	2.21	3.48	0.93	0.006	0.85	6.99	118.31	1.89	468	66	81.6	4.96	2.44	622	13.1	18.9	74.5	7.8	0.48	0	0	0.1	0.01	1.12	4.3	262	331	30	18.1	5.7	12.6	67.6	108	34.9	10.5	0.64	33.7	1.01	6.1	33.9	5.6	109	0.82	4.49	11.6	40.6
206	49	F	58-49	1.97	3.36	1.1	0	1.03	0.94	62.78	0.15	161	11	56.9	1.52	1.92	188	12.3	18.3	116.2	10.8	0.41	0.2	0	0	0	1.06	3.3	160	319	30	21.7	3.5	5.8	63.6	106	33.7	13.9	0.45	27.9	1.28	8	35.7	2.3	57	1.46	5.19	12	37.9
207	79	M	587-79	4.61	6.64	2.09	0.033	1.17	3.47	36.68	0.23	344	123	89	16.68	7.9	374	11.2	17.7	1315.4	6.3	1.18	0	0	0	0	1.15	20.8	470	315	30	41.5	2.4	34.7	78.8	100	35.4	4.7	0.88	43.2	0.82	18.7	35.6	9.2	130	1.37	5.77	12.6	55.3
208	68	F	59-68	2.63	4.1	1.21	0.005	0.94	2.22	69.8	1.82	206	44	61.3	2.61	3.2	234	12.6	24.6	112.6	13.3	0.57	0.3	0.01	0.9	0.04	1.08	2.3	171	310	25	23.3	3.2	11.6	63.2	107	30.6	24.2	1.03	31.5	1.01	4.3	31.7	4	48	1.19	4.93	12.7	39.9
209	30	M	593-30	2.6	4.26	1.16	0	1.23	0.85	0.33	35.2	150	20	68.3	3.77	4.57	175	12.2	23.6	503.1	9.4	0.52	0	0	1.6	0.09	1.04	5.2	244	315	30	21.1	4.1	12.3	70.6	106	28.8	20.7	1.14	23.7	1.98	5.5	46.9	3.6	58	1.01	5.01	11.8	48.3
210	66	F	594-66	1.5	3.8	1.39	0.002	0.93	13.27	1.08	0.22	154	9	53.8	2.55	3.1	167	12.1	24.6	224.5	8.1	0.39	0.4	0.02	2	0.1	1.04	2.6	495	333	32	25.2	25.4	8.1	60.1	108	27.3	35.7	1.7	24	1.5	4.8	36.1	4.6	49	1.19	4.25	12	40.9
211	77	M	595-77	1.69	3.3	1.42	0	0.72	1.35	7.85	0.28	155	19	50	1.43	3.4	194	12.3	22.2	243.4	11.6	0.33	0.5	0.01	1.7	0.05	1.06	7	398	307	30	25.8	1.3	5.9	64.5	105	24.7	36.2	1.03	28.2	1.29	2.9	36.3	3.9	59	0.92	4.56	12.1	43.8
212	61	M	596-61	2.34	3.57	1.16	0.002	0.78	2.57	17.97	0.31	144	97	64.1	3.85	4.5	267	12.4	25.2	230.7	10.4	0.63	0.3	0.02	2	0.12	0.98	2.7	314	331	29	24.7	6.3	9.5	59.9	105	29.5	23.2	1.4	26.9	1.23	6	33	3.8	82	1.26	4.19	12	36.9
213	57	F	597-57	2.37	3.5	2.11	0.01	0.45	2.66	53.59	4.79	294	51	62.4	2.84	3.27	338	12.1	26	77.8	12	0.55	0.4	0.02	1.2	0.05	1.04	1.6	135	308	29	26.4	3.7	7.3	55.3	105	33.9	24	1.09	29.4	0.88	4.6	25.9	2.8	119	1.17	3.76	12.9	34.9
214	57	F	598-69	2.37	3.5	2.11	0.01	0.45	2.66	53.59	4.79	294	51	62.4	2.84	3.27	338	12.1	26	77.8	12	0.55	0.4	0.02	1.2	0.05	1.04	1.6	135	308	29	26.4	3.7	7.3	55.3	105	33.9	24	1.09	29.4	0.88	4.6	25.9	2.8	119	1.17	3.76	12.9	34.9
215	69	F	598-70	3.16	4.71	1.61	0.004	0.91	1.65	4.47	0.63	322	54	61.5	3.87	3.7	245	10.7	21.4	381.6	8.2	0.52	0.2	0.01	0	0	0.98	4.3	179	312	29	28.9	5.3	11.5	58.3	107	32.6	30.1	1.89	26.9	1.17	6.3	31.4	2	68	0.96	3.63	13.3	33.2
216	67	F	599-67	3.07	4.75	1.05	0	1.24	5.24	1.39	5.94	125	14	61.9	4.26	3.6	141	11.9	25	321.1	7.5	0.51	0.2	0.01	1.8	0.12	1.08	4.4	225	310	30	26.6	21.5	9.8	64.3	106	33.7	28.6	1.96	27.1	1.37	6.9	37.2	2.6	79	1.12	4.1	12.4	40
217	64	M	6-64	1.75	3.32	1.07	0.013	1.03	1.53	25.46	0.2	244	8	68.3	2.22	1.77	331	12	18.8	117.7	6.3	0.2	0.1	0	0.1	0	1.03	3.2	313	320	31	24.5	3.3	10.8	67.6	101	36.3	25.2	0.82	29	1.33	3.2	38.6	4.3	56	0.8	3.61	11.3	34.5
218	63	F	60-63	2.92	4.19	1.33	0.006	0.68	3.4	201.9	3.02	261	96	82.3	6.53	2.08	331	11.9	22.8	101.6	6	0.48	0	0	0	0	1.02	3.2	172	331	27	26.9	3.9	28.8	56.7	97	32.5	11.7	0.93	24.1	1.35	7.9	32.6	14.4	151	0.96	3.3	14.8	27
219	66	M	600-66	2.01	4.03	1.54	0	0.72	38.64	155.71	0.53	259	34	83.2	8.44	3.7	302	11.5	18.2	119.6	4.6	0.47	0.1	0.01	0.1	0.01	0.99	5.8	242	333	31	24.3	7.1	10.3	72.5	91	35.5	12	1.22	37	0.96	10.2	35.5	3.9	39	1.92	4.69	12.5	43.5
220	77	M	601-77	1.39	2.65	0.58	0.002	0.92	1.24	2.88	4.74	169	47	0.619	2.26	3.05	206	13.1	22.1	213.8	0.092	0.33	0.009	0.03	0.011	0.04	1.12	4	376	333	32	26.5	1.2	9.5	56.4	105	34.4	0.269	0.98	27.3	1.07	3.6	29.1	4.8	65	1.03	3.5	0.129	33.8
221	74	M	602-74	2.51	4.23	0.56	0	1.2	0.98	2.63	0.63	188	18	81.2	4.31	4.55	243	11.2	26.6	225.9	0.03	0.16	0	0	0.2	0.01	0.97	5.4	162	320	30	20.4	3.6	4.9	65.9	102	23.2	15.6	0.83	31.1	1.12	5.3	34.8	2.2	59	0.79	4	0.121	37.2
222	68	F	603-68	2.64	4.51	1.39	0.002	1.21	1.04	11.51	0.24	205	11	0.472	1.5	3.68	232	11.6	25	119.7	10.5	0.33	0.003	0.01	0.043	0.14	1	2.8	185	326	33	22.3	8.1	5.6	62.5	103	30.4	0.377	1.2	26.1	1.39	3.2	36.4	2.4	61	1.04	3.38	0.125	34.4
223	68	M	604-68	2.59	4.17	0.85	0.001	0.96	7.04	76.35	0.82	271	2	94.6	10.11	4.8	368	12.1	20.4	86.2	0.038	0.41	0	0	0	0	1.04	3.8	124	346	32	27.4	18.4	16.5	57.4	80	33.6	1.6	0.17	26.6	1.16	10.7	30.8	5.8	86	1.99	3.25	0.124	29.6
224	80	M	606-80	2.2	4.25	0.85	0.009	0.89	1.08	100.3	0.52	142	17	0.679	3.95	3.26	181	13.4	17.8	38.3	12	0.7	0	0	0.2	0.01	1.15	4.1	233	314	29	26.9	31	9.9	63.5	105	33.3	19.9	1.16	36.9	0.72	5.8	26.6	4.7	37	0.65	3.42	0.118	31.2
225	73	F	607-73	2.07	3.66	1.96	0.036	0.83	0.69	154.01	5.45	282	10	93.3	12.63	2.1	348	11.6	22.4	16.5	2.4	0.32	0.001	0.01	0.2	0.03	1	10.7	240	306	28	29.7	2.6	6.7	54.3	124	24.5	4	0.54	32.2	0.69	13.5	22.1	3.5	126	0.73	5.02	0.129	45.2
226	80	F	61-80	2.08	3.58	1.28	0.011	0.91	2.4	6.56	2.89	336	13	83.5	2.21	1.9	428	12.3	21.9	66.5	6.9	0.31	0.4	0	0.7	0.02	1.06	9.7	425	325	28	20.3	1.7	8.4	68.8	108	25.9	22	0.76	33.8	1.04	5.5	35	4.2	45	1.03	3.77	11.9	34.5
227	58	M	64-58	2.03	3.39	1.39	0	0.85	1.72	27.12	0.47	137	16	54.6	1.48	3.2	152	11.2	19.1	174.7	10.8	0.29	0.2	0.01	0	0	0.97	3.2	235	329	30	24.9	6.2	9.7	62.8	100	32	34.4	0.93	27.7	1.27	2.7	35.1	3	68	1	5.21	11.3	47
228	29	F	65-29	2.86	4.57	0.79	0	1.16	3.3	6.56	0.59	170	68	74.1	2.75	1.19	227	10.8	21.2	247.9	7.7	0.29	0	0	0.1	0	1.04	2.8	227	312	30	23.4	3.8	5.8	76.5	103	31.5	18.1	0.67	27.8	1.75	3.7	48.7	2.3	54	1.12	4.58	11.4	43.7
229	54	M	66-54	2.57	3.94	1.37	0.012	0.79	2.65	76.68	0.79	501	24	87.8	6.03	1.7	586	13.2	25.8	108.4	5.2	0.36	0	0	0.1	0.01	1.13	8.7	252	329	31	24.2	2.4	9.6	64	103	34.6	6.9	0.47	33	0.94	6.9	31	3.2	34	0.9	4.32	11.3	41.2
230	68	F	69-68	2.29	3.34	1.2	0.021	0.57	1.01	14.13	5.94	199	15	65	1.14	2.71	228	14.2	20.6	79.8	3.8	0.07	0	0	1.5	0.03	1.21	8.3	314	314	31	22	17.5	16.3	64.1	109	36.5	29.7	0.53	30.4	1.11	1.8	33.7	5.9	58	0.59	2.71	17.7	26.6
231	65	F	7-65	2.97	4.41	2.46	0	0.79	4.86	72.16	0.13	160	48	63.4	3.37	2.34	226	11.1	19.2	91.9	9.1	0.48	0	0	0.8	0.04	1	1.7	272	314	30	24.5	5	6.6	66.2	104	26.5	26.7	1.42	35.2	0.88	5.3	31	2.9	70	0.97	3.7	12.8	34.7
232	63	M	70-63	3.88	5.72	1.3	0.022	1.07	9.89	129.62	0.35	330	180	75.4	3.5	3.42	450	12.1	19.1	101.3	4.3	0.2	0.1	0	0	0	1.04	6.3	176	327	29	22.1	2.3	11.1	69.5	96	32.7	20.2	0.94	33.7	1.06	4.6	35.8	4.2	110	1.09	5.1	11.9	45.4
233	33	M	71-33	3.24	4.63	2.52	0	0.63	4.52	137.08	0.47	218	90	71.7	2.23	4.4	251	11.3	21.2	157.1	6.9	0.71	0.1	0	0	0	0.98	6.2	345	324	31	23.6	3.4	17	79.7	97	26.7	27.9	0.4	38.3	1.08	3.3	41.4	6.4	81	1.08	4.55	13.5	42.1
234	41	M	72-41	1.35	2.53	0.56	0.002	0.89	1.31	7.92	0.45	196	21	0.472	1.52	3.3	223	12.6	20.5	134.8	10.8	0.41	0.2	0	0	0	1.08	4	196	319	30	21.7	30.3	8.2	66.1	99	36.8	13.9	0.45	29.4	1.25	6.9	36.7	3.8	53	1.31	4.46	11.7	37.9
235	29	M	73-29	1.69	2.8	0.82	0.01	0.73	5.68	24.12	1.02	475	42	59.1	2.94	2.94	686	13	18.5	73.1	6.8	0.34	0.1	0.01	0.1	0.01	1.12	3.8	201	323	28	22.3	9.5	8.8	59	98	40.6	33.9	1.7	23.4	1.52	5	35.6	4.3	53	1.19	4.82	11.9	42.1
236	29	M	74-67	2.16	3.48	1.06	0.557	0.8	1.17	84.26	0.77	246	18	59.2	2.27	3.41	335	12.8	21	65.4	13.9	0.53	0.1	0	0	0	1.1	5.9	190	317	29	20.6	23.6	7.9	58.3	103	38.1	26.8	1.02	25	1.33	3.8	33.3	3.6	38	0.87	4.82	12.7	44.7
237	37	F	8-37	2.01	3.41	0.8	0	0.88	1.75	10.52	0.25	158	13	68.6	2.79	1.82	217	11.6	18.9	104.7	5.6	0.23	0.2	0.01	0.2	0.01	1	1.9	256	316	28	22	2.2	7.1	70.8	106	31.6	25.4	1.03	32.1	1.21	4.1	38.7	3.2	46	0.84	4.09	12	36.1
238	24	F	81-24	2.23	3.36	0.97	0	0.67	2.61	128.29	0.57	267	43	61.5	3.38	2	330	12.9	18.7	105.6	7.7	0.42	0.1	0.01	0.1	0.01	1.11	2.9	450	310	26	20.5	5.8	7.2	73.5	104	37	30.6	1.68	36.8	1	5.5	36.7	3.1	42	1.31	5.03	13	41.8
239	25	M	82-25	2.48	3.88	1.22	0	0.87	2.49	79.6	0.57	284	42	75.3	5.36	2.9	353	11.7	22.2	153.9	4.5	0.32	0	0	0.1	0.01	1.01	2.7	386	312	29	23.6	4.7	6.4	75.2	105	35.7	20.1	1.43	36	1.09	7.1	39.2	2.5	60	0.62	4.85	11.9	44.6
240	55	M	840-55	2.51	3.65	1.48	0	0.61	4.36	263.31	35.2	303	79	92.9	11.81	4.2	370	12.7	19.3	66.5	0.032	0.41	0	0	0.3	0.04	1.09	5.6	295	316	29	27.1	10.3	9.2	74.2	97	30.4	3.6	0.46	45.8	0.62	12.7	28.4	2.9	176	0.93	4.54	0.125	0.42
241	38	M	90-38	2.88	4.41	1.85	0.004	0.86	4.76	40.75	0.24	226	142	67.2	4.1	3.1	356	12.2	16.5	156.6	8.7	0.53	0	0	0.5	0.03	1.05	3.3	285	319	29	22.4	5.2	12.7	75.3	102	33.5	23.6	1.44	33.5	1.25	6.1	41.8	3.8	94	0.86	5.19	12.5	47.9
242	61	F	92-61	1.76	3.41	0.65	0	1.22	1.65	14.21	0.26	177	13	31.6	1.28	1.88	225	12.5	25.2	103	13.4	0.54	0.1	0	0	0	1.07	4.2	299	317	31	24	2.8	5.8	62.6	103	37.7	54.9	2.22	24.9	1.51	4	37.7	2.5	51	1.05	3.42	11.3	33
243	41	M	94-41	1.79	3.27	1	0	1.04	1.45	18.69	0.48	167	19	68.1	2.89	3.1	191	11.9	19.2	146.3	11.2	0.48	0	0	0.1	0	1.02	5.8	304	319	29	24.3	5.6	9.7	63.5	102	33.6	20.6	0.88	28.6	1.22	4.3	34.9	4.1	43	0.82	4.81	11.2	43.2
244	38	F	95-38	2.48	4.3	1.03	0	1.32	1.47	4.78	0.27	125	10	68.4	3.11	2.4	139	12.5	20.5	208.7	12.2	0.55	0.1	0	0.2	0.01	1.07	3.3	287	322	31	23.4	3.1	6.8	71.7	103	37.5	19.1	0.87	30.6	1.34	4.5	41.1	2.4	48	1.1	4.13	11.6	39.6
245	36	F	96-36	1.83	3.32	1.58	0	0.91	1.99	39.75	0.57	212	16	69.1	2.67	1.14	308	11.8	18.1	114.1	8.1	0.31	0	0	0.1	0	1.02	3.7	179	320	29	25.3	2.4	4.3	65.7	103	32.3	22.7	0.88	28	1.35	3.9	37.7	2.1	39	0.83	4.26	12.5	38.5
246	50	M	99-50	3.19	4.57	1.21	0	0.84	1.63	45.35	0.64	214	13	66.6	2.06	3.79	264	11.9	24	140.8	6.8	0.21	0.1	0	0.6	0.02	1.02	4.1	150	315	30	22.7	2	8.5	63.1	108	33.4	25.9	0.8	28.1	1.25	3.1	35	2.6	42	1.08	4.34	12.2	41.3
[truncated: 61 more columns]
